# Supplementary material
Source: publisher site journal article supplement (https://www.dovepress.com/article/199183)
Supplement: Supplementary file 1 [file get_supplementary_file.php]

| **Study**  **Country, baseline dates**  **Setting**  **Study design**  **MINORS score**  **Journal** | **THA details**  **N patients (hips)**  **Age** | **Follow up**  **Loss to follow- up (%)**  **Any revision; revision for asymptomatic loosening; total failed**  **Asymptomatic loosening assessed**  **Clinical score; X-ray changes**  **Cost information provided** | **Key outcome**  ***Relevant quote*** |
| --- | --- | --- | --- |
| Alfonso et al. 20081  USA, 1998–2004  Single centre, consecutive patients  Retrospective case series  9/16  *J. Arthroplasty* | Hybrid THA  N=20  Mean 68 years (range 35–81) | Mean 6.1 years (range 2.0–10.1)  N=1 lost to follow up or died (5%)  N=0 (0%); 0; (0%); 0 (0%)  Asymptomatic loosening not assessed  HHS; No X-ray changes  No cost information | Clinical outcome: Significant improvement in HHS pain and function in the underweight group of people with THA.  *The Harris hip score significantly improved, demonstrating the benefit of total hip arthroplasty in underweight patients…. Despite a high dislocation rate and high transfusion rate, total hip arthroplasty remains a successful procedure in underweight patients.* |
| Amlie et al. 20102  Norway, 2002–2009  Single centre, consecutive patients, not contemporary groups  Retrospective cohort study  15/24  *J. Orthopaedics & Traumatology* | Mixed THA, 28 or 32mm head size  N=2257 (2572 hips)  28mm 68 years; 32mm 69 years | 28mm (range 1–8 years); 32mm (0.5–7.5)  N=126 lost to follow up (6%)  N=13 (0.5%); 8 (0.3%); 66 (2.6%)  Asymptomatic loosening not assessed  No clinical score; No X-ray changes  No cost information | Dislocation: Lower risk of dislocation in patients receiving 32mm heads compared with 28mm. Size of femoral head affects dislocation risk and, by inference, risk for further treatment/ surgery. |
| Ancelin et al. 20163  France, 1997–2007  Single centre, consecutive patients, contemporary groups  Retrospective case control study  16/24  *Orthopaedics and Traumatology: Surgery and Research* | Uncemented MoM THA in patients with AVN or OA  N=282  AVN mean 44.7 years (range 20.8–64.0); OA 52.0 (18.5–65.0) | AVN Mean 11.6 years (range 6.5–17.5); OA 11.1 (4.5–18.3)  N= 45 lost to follow up (16%)  N=25 (8.9%); 3 (1%); not reported  Asymptomatic loosening not assessed  Postel-Merle d’Aubigné; X-ray changes  No cost information | Prosthesis survival: Revisions for any cause or for dislocation were more common after THA for AVN. Functional outcomes were similar in the AVN and OA groups. |
| Angadi et al. 20124  UK, 1995-2001  Single centre, consecutive patients, contemporary groups  Prospective RCT  18/24  *The Bone & Joint Journal (Br)* | Cemented all PE acetabular component or an uncemented CoCr porous-coated acetabular component  N=287  Cemented all PE mean 71.3 years (range 55–89); Uncemented porous-coated 69.8 (56–89) | Mean 7.6 years (range 0.4–15)  N=16 lost to follow up (6%)  N= 28 (9.9%); 13 (4.5%); not reported  Asymptomatic loosening assessed  HHS; X-ray changes  No cost information | Survival of acetabular component: Twenty cemented and 2 uncemented acetabular components had evidence of acetabular radiolucencies or acetabular component migration. |
| Ateschrang et al. 20145  Germany, 1987-1990  Single centre, consecutive patients  Prospective case series  10/16  *J. Arthroplasty* | Uncemented THA  N=236 (250 hips)  Mean 78.3 years (range 44.3–91.8) | Mean 22.6 years (range 20.0–24.8)  N=90 lost to follow up (36%)  N=11 (4%); 8 (3%); 11 (4%)  Asymptomatic loosening not assessed  HHS; X-ray changes  No cost information | Femoral component survival: The hip stem studied had a high survival rate in older people despite changes of osteopenia, which were similar to other long-term reports of uncemented stem fixation. |
| Avery et al. 20116  UK, 2000-2001  Single centre, consecutive patients, contemporary groups  Prospective RCT  17/24  *The Bone & Joint Journal (Br)* | Cemented THA or hemiarthroplasty for displaced intracapsular fracture of the femoral neck  N=81 (47 followed up)  Mean 80 years (range 72–88) | Mean 9 years (range 7.2–10.3)  N=3 lost to follow up (excluding deaths) (4%)  N=5 (6.2%); 0 (0%); 10 (12.4%)  Asymptomatic loosening not assessed  OHS and SF36; X-ray changes  No cost information | Function and mortality: There was lower mortality and a trend towards superior function in patients with THA in the medium term |
| Baltopoulos et al. 20087  Greece, 1992-1996  Single centre, unclear whether consecutive patients  Prospective case series  9/16  *Acta Orthopaedica Belgica* | Uncemented THA with HA coating  N=164 (176 hips)  Mean 68 years (range 26–87) | Mean 12.8 years (range 11–14)  N=0 lost to follow up  N=3 (2%); 0 (0%); 3 (2%)  Asymptomatic loosening not assessed  HHS; X-ray changes  No cost information | Revision or impending revision due to pain or loosening: Implant studied appeared to be a reliable and safe option for THA. Controlled clinical studies required to achieve consensus on the best type of THA |
| Baumann et al. 20078  Germany, 1990-1992  Single centre, not consecutive patients  Retrospective case series  7/16  *Orthopedics* | Cemented, hybrid THA with titanium stem  N=184  Mean 76 years (range 69–88) | Mean 9.5 years (range 9.0–11.0)  N=74 lost to follow up (40%)  N=6 (5.5%); 4 (3.6%)  Not clear whether asymptomatic loosening assessed  HHS; X-ray changes  No cost information | Aseptic loosening: Good long-term results can be achieved with cemented titanium stem implants. |
| Beaupre et al. 20169  Canada, 1998-2003  Single centre, unclear whether consecutive, but contemporary groups  Prospective RCT  16/24  *J. Arthroplasty* | Uncemented THA with CoC or CoP bearings  N=92 (92 hips)  Mean 53.2 years (SD 6.4) | Mean 10 years (range 10–12)  N= 24 lost to follow up (24%)  N=3 (3%); 0 (0%); 5 (5%)  Asymptomatic loosening not assessed  WOMAC; RAND-12  No cost information | Function, pain and implant failure: Similar improvements between groups in function and pain. No failures or loss of fixation related to bearing surfaces or wear in either group. |
| Belmont et al. 200810  USA, 1982-1984  Single centre, consecutive patients  Prospective case series  11/16  *J. Bone & Joint Surgery (Am)* | Uncemented THA  N=215 (223 hips)  Mean 71.3 years (range 38–93) | Mean 22 years (range 20.0–25.0)  N=102 lost to follow up (47%)  N=50 (22.4%); 49 (21.9%); 53 (23.8%)  Asymptomatic loosening not assessed  HHS; X-ray changes  No cost information | Survival, osteolysis: Spike fixation abandoned to reduce risk of osteolysis and implant failure  *In addition, periprosthetic bone loss due to osteolysis has been associated with pathologic fractures of the greater and lesser trochanters and of the pelvis.* |
| Berend et al. 200511  USA, 1989-2001  Single centre, not consecutive patients, contemporary groups  Retrospective case-control study  14/24  *J. Arthroplasty* | Cemented and uncemented  N=2191 (2551 hips)  Mean 67.1 years (SD 17) | Mean 6.8 years (range 2–16.2)  N=10 lost to follow up (0.5%)  Femoral revision rate 2.4% and 0.6% in cemented and uncemented stems respectively  Not clear whether asymptomatic loosening assessed  HHS; No X-ray changes  No cost information | Femoral fractures and implant survival: The study identified important risk factors for proximal femoral fracture in primary THA  *The revision rate was significantly increased for both cemented and uncemented stems if a proximal femoral fracture occurred* |
| Bernstein et al. 201212  Canada, 1997-2003  Single centre, not consecutive patients  Retrospective case series  8/16  *International orthopaedics* | Uncemented MoM THA  N=165 (196 hips)  Mean 50.9 years (range 17–65) | Mean 8.87 years (range 7.0–13.0)  N=22 lost to follow up (13%)  N=4 (2.5%); 2 (1.2%), 15 (9%)  Not clear whether asymptomatic loosening assessed  HHS, UCLA; No X-ray changes  No cost information | Clinical outcomes: Clinical scores demonstrated that patients maintain excellent outcomes after MOM THA  *We aim to continue to follow this cohort and update the long-term data to ensure that the outcomes maintain an acceptable level.* |
| Biant et al. 200913  Australia, 1998  Single centre, consecutive patients  Prospective case series  12/16  *J. Arthroplasty* | Uncemented THA in patients with DDH  N=22 (28 hips)  Mean 45 years (range 23–74) | Mean 10 years  N=0 lost to follow up  N=0 (0%); 0 (0%); 0 (0%)  Asymptomatic loosening not assessed  HHS, WOMAC, SF12; X-ray changes  No cost information | Clinical outcomes: Excellent results from stem studied. Stem design can influence development of osteolysis |
| Bidar et al. 200914  France, 1990-1994  Single centre, consecutive patients  Prospective case series  11/16  *Orthopaedics and Traumatology: Surgery and Research* | Uncemented HA coated THA  N=101 (111 hips)  Mean age 63.1 years (range 33–83) | Mean 13 years (range 10–18)  N=34 lost to follow up (31%)  N=14 (12.6%); 12 (10.8%); 44 (39.6%)  Asymptomatic loosening assessed  HHS, Postel Merle d'Aubigne; X-ray changes  No cost information | Osteolysis: prosthesis associated with high frequency of retro-acetabular osteolysis. Regular follow up after 10 years advocated to allow for early acetabular revision in cases of retro-acetabular osteolysis  *Reporting the long-term…results of ABG-1TM implants used in primary implantation for THAs underscores the frequency of retroacetabular osteolysis…encourages us to propose regular monitoring of these patients after 10 years of implantation as well as early preventive acetabular revision when progressive osteolysis occurs.* |
| Bodén et al. 200615  Sweden, 1990-1993  Single centre, consecutive patients  Prospective case series  11/16  *J. Orthopaedic Science* | Hybrid THA with HA coated stem  N=105 (115 hips)  Mean age 52 years (range 25–66) | Mean 12.2 years (range 10.0–14.9)  N=9 lost to follow up (8%)  N=20 (17.4:); 11 (9.6%); 23 (20%)  Asymptomatic loosening assessed  HHS: X-ray changes  No cost information | Femoral component survival: Stem studied performed well in a young, high-risk population. Stress related resorption poses long term risk for prosthesis fixation. |
| Boyer et al. 201216  France, 1985-1990  Single centre, not consecutive patients  Retrospective case series  8/16  *International orthopaedics* | Uncemented THA with dual mobility socket  N=205 (240 hips)  Mean age 55.67 years (SD 11.83) | Mean 22 years (range 19–24)  N=111 lost to follow up (46%)  N=39 (16.3%); 9 (13%); not reported  Asymptomatic loosening assessed  HHS; X-ray changes  No cost information | Femoral component survival: Survival rate comparable to similar series.  *We consider radiological loosening as an indication for surgical revision, as osteolysis progresses at least linearly, so an early revision on adequate bone stock presents more chances of success and a better functional prognosis for the patient.* |
| Broeke et al. 201317  The Netherlands, 1997-2002  Single centre, consecutive patients, contemporary groups  Prospective RCT  19/24  *J. Arthroplasty* | Cemented THA  N=72 (75 hips)  Mean age 68.8 years (range 60–76) | Mean 11 years (range 10-13)  N=16 lost to follow up (21%)  N=0 (0%); 0 (0%); 2 (2.7%)  Asymptomatic loosening assessed  OHS, HHS, Rand 36; X-ray changes  No cost information | Bone loss: Stress related resorption poses long term risk for prosthesis fixation.  *For interpretation of their clinical relevance, they need correlation with long-term clinical results, radiographic scores or implant survival. Consequent follow-up is obligatory and will be performed to clarify the link between early predictions and real long-term outcome.* |
| Busato et al. 200818  Switzerland and Canada, 1965-2003  Two centres, not consecutive patients, contemporary groups  Retrospective cohort study  6/16  *Obesity Surgery* | THA  N=18,968 (20,553 hips)  Mean age 64.8 years (95%CI 65.7–65.0) | Mean 15 years  Loss to follow up not reported  Not reported  Asymptomatic loosening not assessed  Hip pain, ambulation; No X-ray changes  No cost information | Pain and function: Patients with high BMI experienced pain relief from THA but do not increase their exercise levels. |
| Buttaro et al. 201719  Argentina, 1985-2006  Single centre, not consecutive patients  Retrospective case series  9/16  *Orthopedics* | Unconstrained THA in patients with ipsilateral polio  N=6 (6 hips)  Mean age 51.33 years (range 27–70) | Mean 10 years (range 7–12)  N=0 lost to follow up  N=1 (17%); 0 (0%); 1 (17%)  Asymptomatic loosening not assessed  HHS, VAS pain; Not clear if X-ray changes assessed  No cost information | Long term stability: Method had favourable long-term clinical results but concern over instability. |
| Carlson et al. 201620  USA, 2002-2003  Single centre, consecutive patients  Prospective case series  9/16  *J. Arthroplasty* | Uncemented THA with a ream and broach technique  N=88 (100 hips)  Mean age 61.6 years (range 25.4–90.2) | Mean 10.9 years (10.0–12.1)  N=22 lost to follow up (25%)  N=4 (4%), 0 (0%); 0 (0%); 5 (5%)  Asymptomatic loosening assessed  HHS, UCLA, Tegner; X-ray changes  No cost information | Stem survival: Excellent outcomes, durability and osteointegration. Long-term follow up advocated to monitor prosthesis durability |
| Caton et al. 201121  France, 1972  Two centres, consecutive patients, contemporary groups  Retrospective case series  15/24  *International Orthopaedics* | Cemented THA  Two series:  N1=83 (86 hips)  Mean age 66 years (range 54–84)  N2=25 (37 hips)  Mean age 55 (range 37–73) | Mean 25 and 30 years  N1=39 lost to follow up (45%)  N1=3 (4%), unknown, 6 (7%)  N2=0 lost to follow up  N2=4 (11%), unknown, 4 (11%)  Not clear if asymptomatic loosening assessed  No clinical outcome; X-ray changes  No cost information | Function, x-ray appearance: Outcomes confirm excellent patient function after 25 years but suggest that PE is the weak point of THA. Long-term follow up needed to monitor wear which can be unpredictable. |
| Chandran et al. 201022  UK, 1988-93  Single centre, consecutive patients, contemporary groups  Prospective quasi-randomised study  18/24  *J. Arthroplasty* | Cemented THA or HA coated uncemented THA  N=191 (232 hips)  Cemented mean age 65.5 years (range 48–75); uncemented 64.5 (45– 75) | Mean 14 years (range 12-16)  N=60 lost to follow up (31.4%)  N=10 (5%); 9 (4.7%); 12 (6.3%)  Asymptomatic loosening assessed  HHS, X-ray changes  No cost information | Prosthesis survival: Cemented and HA coated uncemented THA had similar survival rates at 12 to 16 years.  *…Charnley cemented and Furlong HAC-coated uncemented hip prostheses had similar survival rates at 12 to 16 years…The commonest cause of revision in the Furlong group was severe polyethylene wear, and all revisions in the Charnley group were due to aseptic loosening of the stem.* |
| Chevillotte et al. 201123  France, 1999-2000  Single centre, consecutive patients  Retrospective case series  10/16  *International Orthopaedics* | Uncemented CoC HA coated THA  N=92 (100 hips)  Mean age 52.3 years (range 20–73) | Mean 6 years (range 8.8–10.4)  N=11 lost to follow up (12%)  N=2 (2.2%); 1 (1%); 3 (3%)  Asymptomatic loosening not assessed  HHS, Postel Merle d'Aubigne; X-ray changes  No cost information | Prosthesis survival: Potential value of CoC in younger patients noted. Long-term follow up data not yet available. |
| Choy et al. 201324  Korea, 2001-2005  Single centre, consecutive patients  Retrospective case series  8/16  *Clinics in Orthopedic Surgery* | Uncemented CoC THA  N=142 (148 hips)  Mean age 57.2 years (range 23–81) | Mean 7.8 years (range 6.1–10.1)  N=9 lost to follow up (6%)  N=3 (2%); 2 (1.4%); 7 (4.6%)  Asymptomatic loosening assessed  HHS; X-ray changes  No cost information | Prosthesis survival: Ceramic-on-ceramic THA produced excellent clinical results and implant survival rates with no detectable osteolysis. Osteolysis is a major complication after the total hip arthroplasty. |
| Colo et al. 201625  The Netherlands, 1984-1995  Single centre, not clear if consecutive patients  Retrospective case series  6/16  *Clinical Orthopaedics & Related Research* | Cemented THA in patients with DDH  N=22 (28 hips)  Mean age 48 years (26–74) | Mean 20 years (range 16–29  N=4 lost to follow up (18%)  N=2 (7%); 1 (4%); 2 (7%)  Asymptomatic loosening not assessed  HHS; X-ray changes  No cost information | Prosthesis survival: Cemented primary THA with impaction bone grafting showed satisfying long-term results in patients with previous DDH. |
| Corten et al. 201126  Canada, 1987-1992  Single centre, consecutive patients, contemporary groups  Prospective RCT  19/24  *J Bone & Joint Surgery (Am)* | Cemented or uncemented THA  N=250 (80 at follow up)  Mean age 64 years | Mean 20 years (range 17–21)  N=157 lost to follow up (63%)  N=79 (32%); 77 (31%); 79 (32%)  Not clear if asymptomatic loosening assessed  HHS; X-ray changes  No cost information | Prosthesis survival: RCT with long-term follow up identified cemented THA, younger age and male sex as predictive of revision  *In this randomized controlled design, we found age and gender to be important prognosticators for THA failure. … The requirements of implants to withstand the activity level of patients thus are gender-specific with the most strenuous requirements being for male patients.* |
| Costi et al. 201727  Australia, 1990-2007  Single centre, consecutive patients, contemporary groups  Prospective case series  17/24  *J. Arthroplasty* | Cemented stem THA in young patients  N=52 (65 hips)  Mean age 34 years (range 16–40) | Mean follow up 12 years (range 1–22)  N=4 lost to follow up (7.7%)  N=15 (24.6%); 10 (15.4%) n/a  Asymptomatic loosening not assessed  HHS; X-ray changes  No cost information | Stem survival: Cemented polished stem showed excellent results in young patients with pathology other than primary osteoarthritis |
| Danesh-Clough et al. 200728  Canada, 1996-1999  Single centre, not consecutive patients, contemporary groups  Retrospective case series  9/16  *J. Arthroplasty* | Uncemented THA with standard or high offset versions  N=193 (210 hips)  Mean age 58.3 years (range 22–85) | Mean follow up 6.25 years (range 5–8)  N=10 lost to follow up (5%)  N=3 (2%); 1(0.5%); 4 (3%)  Asymptomatic loosening not assessed  SF12, WOMAC, HHS; X-ray changes  No cost information | Implant survival: Excellent bone in-growth and stem survival. No problems related to use of high offset stems |
| D'Antonio et al. 201229  USA, 1996-2011  Multiple centres, unclear if consecutive patients, contemporary groups  Prospective RCT  17/24  *Clinical Orthopaedics & Related Research* | Cemented THA with CoC or MoP bearings  N=253 (289 hips)  Mean age 54.2 years (range 21–75) | Mean follow up 10.3 years (range 10–12.45)  N=51 hips lost to follow up (18%)  N=16 (5.5%); 3 (1%); 17 (6%)  Asymptomatic loosening assessed  HHS; X-ray changes  No cost information | Implant survival: Fewer revisions and less osteolysis in CoC compared with MoP group. Ceramic bearings are a good option for young and more active patients.  *Continued clinical follow up over the next decade will further measure the value of the hard-on-hard ceramic bearings for THA* |
| Datir & Wynn-Jones 200530  UK, 1978–1998  Single centre, not consecutive patients, bilateral different implants  Retrospective case series  14/24  *Acta Orthopaedica* | Cemented staged bilateral THA with smooth and matt surface stems  N=51 (102 hips)  Mean age smooth 66 years (range 51–81); matt 69 (56–82) | Median follow up smooth 11 years (range 4.3–21); matt 10 (9.3–10.7)  N=12 lost to follow up (12%)  N=15 (15%); 11 (11%); 18 (18%)  Asymptomatic loosening assessed  No clinical score; X-ray changes  No cost information | Implant survival: Smooth-surface stems had better survivorship than matt-surface stems |
| de Kam et al. 201031  The Netherlands, 1988-2004  Single centre, consecutive patients, contemporary groups  Prospective case series  15/24  *Acta Orthopaedica* | Cemented THA  N=140 (168 hips)  Mean age 46 years (range 40–49) | Mean follow up 9.7 years (range 2.0–19.3  N=18 lost to follow up (13%)  N=29 (17%); 15 (9%); 52 (31%)  Asymptomatic loosening assessed  HHS, OHS, VAS pain; X-ray changes  No cost information | Implant survival. Good results with cemented total hip arthroplasty in patients between 40 and 50 years of age |
| de Witte et al. 201132  The Netherlands, 1989-1997  Single centre, consecutive patients, not contemporary groups  Prospective case series  11/16  *J. Bone & Joint Surgery (Am)* | Uncemented THA  N=96 (120 hips)  Mean age 55.9 years (range 30.7–66) | Mean follow up 11.8 years (range <1–17)  N=15 lost to follow up (16%)  N=14 (12%); 10 (8%); 14 (12%)  Asymptomatic loosening not assessed  Postel Merle d'Aubigne; X-ray changes  No cost information | Implant survival. Higher rates of PE wear increase risk of earlier aseptic revision of THA  *Patients who had a revision procedure because of aseptic cup loosening within ten years of follow-up had a significantly higher rate of polyethylene wear than did the patients who did not have a revision due to cup loosening within ten years.* |
| Delaunay et al. 201633  France, 1995-2004  Multicentre, not consecutive patients  Retrospective case series  9/16  *Clinical Orthopaedics & Related Research* | Uncemented MoM THA  N=68 (83 hips)  Mean age 42 years (range 24-50) | Mean follow up 13 years (range 2-19)  N=18 lost to follow up (26.5%)  N=4 (4.8%), 1 (1.2%), 4 (4.8%)  Asymptomatic loosening not assessed  Postel Merle d'Aubigne; no X-ray changes  No cost information | Implant survival. Continuous follow up and longer-term results with extensive imaging necessary to confirm experience with cementless THA and 28-mm Metasul articulation. |
| Emans et al. 200934  The Netherlands, 1986-1996  Single centre, unclear if consecutive patients  Prospective case series  7/16  *Hip International* | HA coated uncemented THA  N=57 (65 hips)  Mean age 40 years (range 18-50) | Mean follow up 5.8 years (range 5-8)  N=7 lost to follow up (12%)  N=13 (23%); 3 (5%); 13 (23%)  Unclear if asymptomatic loosening assessed  HHS; X-ray changes  No cost information | Implant survival. Long-term results of HA-coated THA very promising and may reduce number of reoperations. |
| Epinette et al. 201335  France, 1997-2002  Multicentre, consecutive patients  Prospective case series  11/16  *The Bone & Joint Journal (Br)* | HA-coated uncemented THA  N=1053 (1148 hips)  Mean age 64.77 (range 22-80) | Mean follow up 10.84 years (range 10-15.25)  N=170 lost to follow up (15%)  N=40 (3.5%); 9 (0.7%); 40 (3.5%)  Asymptomatic loosening not assessed  HHS, Postel Merle d'Aubigne; X-ray changes  No cost information | Femoral component survival. Use of HA coating of uncemented implants produced survival rates equivalent to best cemented components  *Hydroxyapatite outcomes also compare favourably with the best cemented published series, even in younger patients* |
| Ferreira et al. 201736  France, 2001-2005  Single centre, consecutive patients, contemporary groups  Retrospective case series  8/16  *International Orthopaedics* | Uncemented Ti/ HA coated CoC THA  N=116 (126 hips)  Mean age 70.1 years (range 32-98) | Mean follow up 12.2 months (range (122-170)  N=10 lost to follow up (8.6%)  N=6 (4.8%); 4 (3.2%); 10 (7.4%)  Asymptomatic loosening assessed  Postel-Merle d’Aubigné; X-ray changes  No cost information | Implant survival. THA with CoC bearings gave reliable outcome. |
| Gavaskar et al. 201737  India, 2006-2010  Single centre, consecutive patients, contemporary groups  Prospective case series  16/24  *J. Arthroplasty* | Uncemented THA and acetabular reconstruction for treatment of acetabular fractures.  N=47 (27 initial surgery; 20 initial non-surgical)  Mean age 48 years (SD 9) | Mean follow up 84 months (SD 17)  N=3 lost to follow up (6.4%)  N=4 (7%); 2 (2%); 4 (7%)  Asymptomatic loosening assessed  Postel-Merle d’Aubigné; X-ray changes  No cost information | Clinical outcomes. Acetabular fracture can be successfully treated with initial THA |
| Greiner et al. 201638  USA, 2002-2006  2 centres, consecutive patients, contemporary groups  Prospective cohort study  11/16  *J. Arthroplasty* | Uncemented MoM THA with modular acetabular component and  N=148 (169 hips)  Mean age 51.6 years (range 25.4-69.7) | Mean follow up 7.4 years (range 5.0-12.4)  N=11 lost to follow up (7.4%)  N=7 (4.1%); 1 (0.6%); 7 (4.1%)  Asymptomatic loosening not assessed  HHS, WOMAC, SF-36, UCLA; X-ray changes  No cost information | Revision. Long term follow up showed presence of damaging changes in MoM bearing |
| Hallan et al. 200639  Norway, 1984-1991  Single centre, not consecutive patients, contemporary groups  Retrospective case series  14/24  *Acta Orthopaedica* | 3 different uncemented THA  N=82 (96 hips)  Mean age 43-56 years (range 19 to 74 | Mean follow up 12 years (range 7-18)  No loss to follow up reported  N=46 (68%); 21 (11%); 46 (68%)  Unclear if asymptomatic loosening assessed  X-ray changes  No cost information | Implant survival. Regular radiographic evaluation necessary to avoid catastrophic asymptomatic failure  *The poor long-term results with these uncemented total hip arthroplasties illustrate the necessity of regular radiographic evaluation in order to detect osteolysis and liner failure, which are both generally asymptomatic until catastrophic failure appears* |
| Hartofilakidis et al. 200940  Greece, 1988-1995  Single centre, not consecutive patients, not contemporary groups  Retrospective case series  13/24  *J. Arthroplasty* | Cemented or uncemented THA  N=37 cemented (50 hips); 36 uncemented (51)  Mean age cemented 45.4 years; uncemented 39.6 (range 25-55) | Mean follow up 15.4; 12.4 years  No losses to follow up reported  N=14 (28%), 18 (35%); 14 (28%), 6 (12%); 14 (28%), 18 (35%)  Unclear if asymptomatic loosening assessed  X-ray changes  No cost information | Acetabular survival. Uncemented components had more durable fixation than cemented components  *The fact that expansile osteolysis does not always lead to symptomatic loosening points to the necessity of close radiographic monitoring of the patients with total hip arthroplasty, especially in those with cementless acetabular components* |
| Hartofilakidis et al. 201141  Greece, 1976-1994  Single centre, consecutive patients, contemporary groups  Prospective case series  15/24  *J. Bone & Joint Surgery (Am)* | Cemented, uncemented or hybrid THA in patients with high dislocation  N=67 (84 hips)  Mean age 49 years (range 23-70) | Minimum follow up 15 years (range 15-32)  N=14 lost to follow up (17%)  N=37 (44%); 24 (29%); 45 (54%)  Asymptomatic loosening assessed  Postel-Merle d’Aubigné; X-ray changes  No cost information | Implant survival. Authors report value of long-term follow up for comparing results of newer techniques and designs  *...Additionally, three more acetabular and five more femoral components were classified as probably loose on current radiographs….* |
| Hernandez-Vaquero et al. 2008 42  Spain, 1976-1993  Single centre, not clear if consecutive  Retrospective case series  7/16  *BMC Musculoskeletal Disorders* | Cemented THA  N=294 (404 hips)  Mean age 67 years (SD 8.8, range 36-91) | 5-25 year follow up  72.2% lost to follow up  Not reported  Unclear if asymptomatic loosening assessed  X-ray changes not reported  No cost information | Implant survival. No difference between DGH and specialist centres for long term survival of THA |
| Higuchi et al. 201743  Japan, 2001-2011  Single centre, consecutive patients, contemporary groups  Prospective case series  12/24  *J. Arthroplasty* | Uncemented CoC THA  N=155 (160 hips)  Mean age 54.8 years (range 28-72) | 5-15 years follow up  N=7 lost to follow up (4.5%)  N=1 (0.6%); 0; 1 (0.6%)  Asymptomatic loosening not assessed  HHS; X-ray changes  No cost information | Liner malseating.  *Malseating (of the acetabular liner) did increase the incidence of osteolysis, a risk factor for adverse effects* |
| Higuchi et al. 201744  Japan, 2001-2010  Single centre, consecutive patients, contemporary groups  Retrospective case series  17/24  *J. Arthroplasty* | Uncemented CoC THA with or without metal backed Ti sleeve  N=236 (246 hips)  Mean age no sleeve 55.2 years (33-74); with sleeve 54.2 years (28-76) | Mean follow up 8.1 years (range 5-14)  N=14 lost to follow up (5.9%)  N=4 (1.6%); 1 (0.4%); 4 (1.6%)  Asymptomatic loosening not assessed  HHS; X-ray changes  No cost information | HHS. There were no clinical, radiographic, or survivorship differences between groups with or without metal backed titanium sleeve |
| Huddleston et al. 201045  USA, 1992-1997  Single centre, not consecutive patients, contemporary groups  Retrospective case control  16/24  *J. Arthroplasty* | Uncemented THA with Hylamer or conventional polyethylene liner  N=46 (49 hips); 35 (41)  Mean age 57; 60 (range 33-83) | Mean follow up 10 years (range 2.9-14)  Loss to follow up not reported  N=8 (9%); 8 (9%); 8 (9%)  Asymptomatic loosening assessed  X-ray changes  No cost information | Osteolysis. The prevalence of pelvic osteolysis with a Hylamer liner was double that of the conventional polyethylene liner |
| Hui et al. 200846  China, 1998-2001  Single centre, consecutive patients  Prospective case series  11/16  *J. Arthroplasty* | Hybrid THA for treatment of femoral head necrosis  N=107 (115 hips)  Mean age 59.7 years (range 30-80) | Mean follow up 6.9 years (range 5-9)  N=22 lost to follow up (19%)  N=1 (1%); 0; 1 (1%)  Asymptomatic loosening not assessed  HHS; X-ray changes  No cost information | Implant survival. Hybrid THA in patients with osteonecrosis of the femoral head had a satisfactory clinical and radiographic outcome at 5-year follow-up |
| Hwang et al. 201347  South Korea, 1993-1999  Single centre, consecutive patients  Retrospective case series  11/16  *J. Arthroplasty* | Uncemented MoM THA  N=141 (180 hips)  Mean age 43.3 years (range 19-55) | Mean follow up 14.4 years (range 12-18)  N=0 lost to follow up  N=4 (2.3%); 4 (2.3%); 6 (3.4%)  Asymptomatic loosening not assessed  HHS; X-ray changes  No cost information | Implant survival. Long-term results of second generation MoM THA with a small head were encouraging with relatively few failures and complications |
| Issa et al. 201648  USA, 2001-2010  4 centres, consecutive patients, contemporary groups  Retrospective case control  9/16  *J. Bone & Joint Surgery (Am)* | Uncemented THA in super-obese and non-obese patients  N=180 (192 hips)  Mean age super-obese 54 years (range 36-71); non-obese 55 (48-75) | Mean follow up 6 years (range 4-12)  N=3 lost to follow up (2%)  N=9 (4.7%); 7 (3.7%); 9 (4.7%  Asymptomatic loosening not assessed  HHS, SF-36, UCLA; X-ray changes  No cost information | Clinical outcomes. Clinical and patient-reported outcomes of primary THA were lower in super-obese patients  *Further studies with longer follow-up are needed to better evaluate the outcomes of these patients......super-obese patients achieved … lower clinical outcome scores, a higher revision rate, and higher complications…compared with the matched group of non-obese patients at a mean follow-up of six years* |
| Issa et al. 201349  USA, 2001-2007  2 centres, not consecutive patients, contemporary groups  Retrospective case series  16/24  *J. Arthroplasty* | Uncemented THA in patients with and without sickle cell disease  N=32 sickle cell (42 hips); not sickle cell 87 (102 hips)  Mean age 37 years; 43 | Mean follow up 7.5 years; 7.0 (range 3.0-10.5)  Loss to follow up not reported  N=5 (12%); 2 (5%)  Unclear if symptomatic loosening assessed  HHS; X-ray changes  No cost information | Implant survival. THA outcomes improved with use of uncemented implants. |
| Ito et al. 201150  Japan, 2002-2004  Single centre, not consecutive patients  Retrospective case series  7/16  *International Orthopaedics* | Hybrid THA with Chiari pelvic osteotomy in patients with dysplastic hips  N=124 (128 hips)  Mean age 62.5 years (range 30-87) | Mean follow up 6.5 years (range 5.0-7.0)  Loss to follow up not reported  N=4 (3%); 0; 4 (3%)  Asymptomatic loosening not assessed  HHS; X-ray changes  No cost information | Implant survival. Chiari osteotomy for hips without good congruency superior to peri-acetabular osteotomy |
| Jenkins et al. 201351  Scotland, 2010  Single centre, consecutive patients, contemporary groups  Prospective case series  11/16  *The Bone & Joint Journal (Br)* | THR  N=384  Mean age 66.1 (SD 12.9) | Up to 1 year follow up  7% lost to follow up  0; 0; 0  Asymptomatic loosening not assessed  OHS, EQ-5D  Costs reported | Costs. THA is cost-effective. Improved patient selection will increase cost-effectiveness.  *THR and TKR are among the most cost-efficient procedures available in the NHS…if services are to be rationed because of financial constraints, careful patient selection to optimise the clinical margin using the predictors we have identified may help to improve further the cost-effectiveness…* |
| Jialiang et al. 200952  China, 2000 -2002  Single centre, consecutive patients  Prospective case series  8/16  *J. Arthroplasty* | Uncemented THA with Duraloc cup  N= 6 (82 hips)  Mean age 38.5 years (range 21-50) | Mean follow up 6.2 years (range 5.0-7.0)  N=12 lost to follow up (16%)  N=3 (5%); 0; 3 (5%)  Asymptomatic loosening assessed  HHS; X-ray changes  No cost information | Implant survival. No aseptic loosening of components, but there was a high rate of polyethylene liner wear and acetabular osteolysis.  *Further follow-up for this cup is therefore needed, and osteolysis and PE wear should be continued observed in young active patients.* |
| Kang et al. 201153  Korea, 2001-2004  Single centre, not consecutive patients  Prospective case series  9/16  *Yonsei medical journal* | Uncemented THA with secondary OA due to dysplasia  N= 42 (45 hips)  Mean age 48.5 years (21-65) | Mean follow up 6.5 years (range 5-8)  N=0 lost to follow up  N=2 (5%); 1 (2%); 2 (5%)  Asymptomatic loosening assessed  HHS; X-ray changes  No cost information | Implant survival. THA with a proximal modular femoral stem gave good mid-term results in patients with secondary OA due to dysplasia.  *Although our current study conducted mid to long-term follow-up observation, all the stems were stable and no osteolysis of the distal femur was observed. We believe these results are related to the design of this prosthesis.* |
| Kang et al. 201054  Korea, dates not stated  Single centre, not consecutive patients  Retrospective case series  8/16  *Yonsei medical journal* | Uncemented THA  N=52 (64 hips)  Mean age 41 years (range 28-45) | Mean follow up 12 years (range 10-15)  N=19 lost to follow up (27%)  N=4 (6.3%); 3 (4.7%); 4 (6.3%)  Unclear if symptomatic loosening assessed  HHS; X-ray changes  No cost information | Implant survival. Long-term results of uncemented THA were acceptable.  *However, polyethylene wear and osteolysis should carefully be followed over the long term.* |
| Kawano et al. 201355  Japan, 1998-2000  Single centre, unclear if consecutive patients  Prospective case series  7/16  *J. Arthroplasty* | Uncemented CoC THA  N= 229 (270 hips)  Mean age 59.7 years (range 24-86) | Mean follow up 11.4 years (11-13)  N=74 lost to follow up (33.6%)  N=58 (25%); 4 (1.7%); 58 (25%)  Unclear if symptomatic loosening assessed  JOA, X-ray changes  No cost information | Implant survival. Prostheses with CoC bearings can have catastrophic results |
| Kilicarslan et al. 201156  Turkey, 1998-2006  Single centre, not consecutive patients  Retrospective case series  10/16  *Joint Diseases & Related Surgery* | Uncemented THA for patients with dysplastic or dislocated hips  N=69 (103 hips)  Mean age 45.6 years (range 20-72) | Mean follow up 7.2 years (range 2.0-10.1  N=0 lost to follow up  N=1 (1%); 0; 1 (1%)  Asymptomatic loosening not assessed  HHS; X-ray changes  No cost information | Implant survival. Uncemented THA is effective for treating dysplastic and dislocated hips. |
| Kim et al. 200557  South Korea, 1995-1998  Single centre, consecutive patients  Prospective case series  11/16  *J. Arthroplasty* | Uncemented THA with CoP bearing  N=75 (82 hips)  Mean age 59 years (range 34-75) | Mean follow up 7 years (5-9)  N=12 lost to follow up (16%)  N=1 (1%); 0; 1 (1%)  Unclear if asymptomatic loosening assessed  HHS, X-ray changes  No cost information | Implant survival. Nonmodular press-fit acetabular component with CoP bearing surfaces had satisfactory midterm results for fixation and polyethylene wear  *Therefore, the stability and wear-induced osteolysis are the predominant factors that compromise the longevity of arthroplasty. … Further follow-up, however, is necessary..* |
| Kim et al. 200558  Korea, 1986-1991  Single centre, consecutive patients  Retrospective case series  10/16  *Acta Orthopaedica* | Uncemented THA for patients with osteonecrosis  N=72 (81 hips)  Mean age 53 years (range 33-64) | Mean follow up 12.5 years (range 10-16)  N=10 lost to follow up (14%)  N=16 (22%); 12 (17%); 18 (25%)  Asymptomatic loosening assessed  HHS; X-ray changes  No cost information | Implant survival. First generation Harris Galante implants frequently associated with pain, unstable fixation, and osteolysis. Excessive wear was frequent. |
| Kim et al. 201059  Korea, date not stated  Single centre, consecutive patients  Prospective case series  10/16  *International Orthopaedics* | Uncemented CoC THA for patients with osteonecrosis  N=64 (93 hips)  Mean age 38.2 years (24-45) | Mean follow up 11.1 years (range 10-13)  N=0 lost to follow up  N=0; 0; 0  Asymptomatic loosening not assessed  HHS; X-ray changes  No cost information | Osteolysis. THA with CoC bearings function well with no osteolysis in young patients with osteonecrosis. |
| Kim et al. 201160  Korea, 2000-2002  Single centre, consecutive patients  Prospective case series  10/16  *J. Arthroplasty* | Uncemented CoP THA for young patients with osteonecrosis  N=71 (73 hips)  Mean age 45.5 years (range 20-50) | Mean follow up 8.5 years (range 7-9)  N=0 lost to follow up  N=0; 0; 0  Asymptomatic loosening not assessed  HHS; X-ray changes  No cost information | Implant survival. Follow up at mean 8.5 years showed no aseptic loosening in osteonecrosis patients with CoP THA |
| Kim et al. 201261  Korea, 1993-2000  Single centre, not consecutive patients, contemporary groups  Retrospective case series  18/24  *J. Arthroplasty* | Cemented or uncemented THA  N=978 (1024)  Mean age 39.3 years (range 20-50) | Mean follow up 14.5 years (range 10-17)  N=0 lost to follow up  N=18%; 6%; 18%  Unclear if asymptomatic loosening assessed  HHS, WOMAC, UCLA; X-ray changes  No cost information | Osteolysis. Incidence of osteolysis similar in cemented and uncemented THA.  *Although the long-term fixation of the acetabular*  *metallic shell was outstanding, wear and periacetabular*  *osteolysis constitute the major challenges in contemporary*  *cemented and cementless THAs in young patients.* |
| Kim et al. 201662  Korea, 1995-2000  Single centre, consecutive patients, contemporary groups  Retrospective case series  10/16  *J. Arthroplasty* | Uncemented THA for young patients  N=871 (1131 hips)  Mean age 52.9 years (range 20-64) | Mean follow up 18.8 years (range 15-20)  N=21 (2.3%) lost to follow up  N=9 (0.8%); 0; 9 (0.8%)  Asymptomatic loosening not assessed  HHS; X-ray changes  No cost information | Clinical outcomes.  *Cementless third-generation alumina-on-alumina ceramic bearings in young patients provide outstanding long-term fixation and provide a high rate of survivorship without evidence of osteolysis* |
| Korovessis et al. 200663  Greece, 1994-1999  Single centre, consecutive patients  Prospective case series  12/16  *J. Bone & Joint Surgery (Am)* | Uncemented MoM THA  N=194 (207 hips)  Mean age 55.5 years (range 25-70) | Mean follow up 6.4 years (range 5-9.3)  N=0 lost to follow up  N=14 (6.8%); 9 (4%); 14 (6.8%)  Unclear if asymptomatic loosening assessed  HHS, WOMAC, UCLA; X-ray changes  No cost information | Implant survival. MoM THA associated with wear and periprosthetic osteolysis  *Our findings are in agreement with those in recent publications and support the possibility that periprosthetic osteolysis and aseptic loosening in hips with a metal-on-metal articulation are possibly associated with hypersensitivity to metal debris.* |
| Lainiala et al. 201464  Finland, 2002-2010  Single centre, unclear if consecutive patients  Prospective case series  8/16  *The Bone & Joint Journal (Br)* | Uncemented MoM THA  N=371 (430 hips)  Mean age 62.7 years (range 28-85) | Mean follow up 7.5 years (range 0.1-10.8)  N=34.9 lost to follow up (9%)  47 (12.7%); not stated; 47 (12.7%)  Unclear if asymptomatic loosening assessed  OHS; X-ray changes  No cost information | Implant survival. High incidence of adverse reactions to metal debris in MoM THA  *...we support the MHRA guidelines and recommend systematic follow-up of MoM THR patients to detect ARMD before the development of devastating soft-tissue complications.* |
| Le et al. 201165  USA, 1988-1994  Single centre, not consecutive patients  Prospective case series  10/16  *Clinical Orthopaedics & Related Research* | Uncemented THA  N=50 (59 hips)  Mean age 52 years (range 18-70) | Mean follow up 17 years (Range 15-20.2)  N=24 lost to follow up (41%)  N=9 (18%); 6 (12%); 9 (18%)  Unclear if asymptomatic loosening assessed  HHS; X-ray changes  No cost information | Implant survival. Long term FU showed cementless femoral stems may be associated with non-progressive stress shielding in Gruen zone 7 |
| Lee et al. 201166  South Korea, 2000-2003  Single centre, not consecutive patients  Retrospective case series  9/16  *J. Arthroplasty* | Uncemented/ hybrid THA with HXL polyethylene  N=109 (113 hips)  Mean age 58 years (40-73) | Mean follow up 7.9 years (7.0-10.5)  N= 0 lost to follow up  0; 0; 12 (10.6%)  Asymptomatic loosening not assessed  HHS; X-ray changes  No cost information | Osteolysis. THA with HXL polyethylene in Asian population showed low osteolysis and aseptic loosening despite mechanical stresses |
| Li et al. 201067  Taiwan, 1993-2004  Single centre, not consecutive patients  Retrospective case series  9/16  *Acta Orthopaedica* | Uncemented/ hybrid THA in haemodialysis patients  N=20 (20 hips)  Mean age 66 years (range 38-81) | Mean follow up 7 years (range 2-13)  0 lost to follow up  N=1 (5%); 1 (5%); 2 (10%)  Asymptomatic loosening not assessed  Postel-Merle d’Aubigné; X-ray changes  No cost information | Clinical outcomes. Promising medium-term results for uncemented THA in patients with long-term haemodialysis |
| Lim et al. 201268  South Korea, 1997-2008  Single centre, not consecutive patients, contemporary groups  Retrospective case series  18/24  *Hip International* | Uncemented THA in renal transplant patients  N=33 renal transplant patients (48 hips) compared with 72 (96 hips) matched non-transplant patients  Mean age 44 years (range 22-68) | Mean follow up 7.2 years (range 2-13)  0 lost to follow up  N=9 (6.45); 8 (5.7%); 9 (6.4%)  Asymptomatic loosening assessed  HHS; X-ray changes  No cost information | Clinical and radiographic outcomes. No differences between groups in rates of complications or revisions |
| Little et al. 200669  USA, 1984-1987  Single centre, unclear if consecutive patients  Prospective case series  7/16  *J. Arthroplasty* | Uncemented THA  N=123 (133 hips)  Mean age 55 years (range 17-86) | Mean follow up 15.3 years (SD 1.9)  N=52 lost to follow up (43%)  N=35 (38.5%); 33 (35.5%); 40 (44%)  Asymptomatic loosening assessed  HHS, WOMAC; X-ray changes  No cost information | Implant survival. Survival of the implant declined markedly after 10 years  *The authors believe that patients with this implant as well as all implants placed in a similar time frame need to be followed up regularly after 10 years.* |
| Loughead et al. 201270  Canada, 1985-1988  Single centre, consecutive patients  Prospective case series  9/16  *J. Bone & Joint Surgery (Am)* | Uncemented THA  N=279 (311 hips)  Mean age 61 years (range 20-86) | Mean follow up 23 years  N=171 lost to follow up (55%)  N=47 (15%); 43 (14%); 47 (15%)  Unclear if asymptomatic loosening assessed  HHS; X-ray changes  No cost information | Implant survival. Revision more common in younger people with THA due to longevity, health status and increased wear |
| Lubbeke et al. 201171  Switzerland, 1996-2003  Single centre, consecutive patients  Prospective case series  11/16  *The Bone & Joint Journal (Br)* | Hybrid THA  N=941 (1048 hips)  Mean age 67.7 years (range 30-91) | Mean follow up 7.9 years (range 4-12)  508 lost to follow up (52%)  Not stated; N=4 (0.9%); not stated  Asymptomatic loosening assessed  UCLA; X-ray changes  No cost information | Osteolysis. Higher activity reduces survival of implant |
| Lubbeke et al. 201472  Switzerland, 1996-2011  Single centre, consecutive patients, contemporary groups  Prospective case series  18/24  *The Bone & Joint Journal (Br)* | Small head uncemented/ hybrid MoM or CoP THA  N=2714 (3341 hips)  Mean age 69.1 years (range 24-98) | Mean follow up 9.5 years (range 1.5-16.8)  26.3% lost to follow up  2%; N=17 (0.5%); not stated  Asymptomatic loosening assessed  HHS, UCLA, SF12; X-ray changes  No cost information | Implant survival. After ten years, MoM THA had a higher risk of all-cause revision than CoP THA.  *This raises concerns about the long-term local effects of small-head MoM bearings, in addition to their possible systemic effects. For this reason, close follow-up, even after ten years, is strongly recommended.* |
| Lusty et al. 200773  Australia, 1997-1999  Single centre, consecutive patients  Prospective case series  11/16  *J. Bone & Joint Surgery (Am)* | Uncemented CoC THA  N=283 (301 hips)  Mean age 58 years (range 20-76) | Mean follow up 6.5 years (range 5-9.2)  N=32 lost to follow up (10.6%)  N=9 (3%); 1 (0.5%); 9 (3%)  Unclear if asymptomatic loosening assessed  HHS; X-ray changes  No cost information | Implant survival. Uncemented CoC THA showed low wear and osteolysis at 5 years |
| Maggs et al. 201674  UK, 2000-2002  Single centre, consecutive patients  Retrospective case series  10/16  *The Bone & Joint Journal (Br)* | Cemented flanged THA  N=194 (203 hips)  Mean age 70.5 years (range 46-93) | Mean follow up 12 years (range 10-13.9)  N=66 lost to follow up (32.5%)  N=8 (3.9%); 0; 8 (3.9%)  Asymptomatic loosening not assessed  OHS, HHS, EQ-5D; X-ray changes  No cost information | Clinical and radiographic outcomes. Flanged THA had excellent clinical outcomes and survivorship |
| Martz et al. 201775  France, 2000-2008  Single centre, consecutive patients, contemporary groups  Retrospective case series  9/16  *International Orthopaedics* | Cemented and uncemented THA with dual mobility cups in osteonecrosis patients  N=31 (40 hips)  Mean age 44 years (range 40-48) | Mean follow up 10.6 years (range 8-13.6)  N=11 lost to follow up (35.5%)  N=0; 0; 3 (7.5%)  Asymptomatic loosening assessed  HHS, HOOS, EQ5D, satisfaction; X-ray changes  No cost information | Clinical outcomes. THA with dual mobility cups preserved mobility and activity and had low dislocation rates and very good survival rates |
| Matharu et al. 201776  UK, 2004-2010  Single centre, consecutive patients, contemporary groups  Retrospective case series  10/16  *The Bone & Joint Journal (Br)* | Uncemented THA  N=504 (569 hips)  Mean age 60.4 years (range19.8-88) | Minimum follow up 8 years  N=23 lost to follow up (4%)  N=75 (13.2%); 8 (1.4%); 97 (17%)  Asymptomatic loosening not assessed  OHS  No cost information | Implant survival. Survival of the acetabular component was significantly higher in hips with a 26-mm femoral head than in those with a 32-mm femoral head |
| McLaughlin et al. 201677  USA, 1983-1990  Single surgeon, consecutive patients, contemporary groups  Retrospective case series  10/16  *J. Arthroplasty* | Uncemented THA for patients with Dorr type C proximal femoral morphology  N=91 (108 hips)  Mean age in those followed up 36.4 years (range 20-49) | Mean follow up 25 years (range 20-29)  N=15 lost to follow up (16.5%)  N=9 (8.3%); 0; 9 (8.3%)  Asymptomatic loosening assessed  HHS; X-ray changes  No cost information | Implant survival. Taperloc stem showed similar results in different Dorr type bone morphologies |
| Min et al. 200878  South Korea, 1993-1996  Single centre, consecutive patients  Prospective case series  9/16  *J. Arthroplasty* | Uncemented THA in patients with osteonecrosis  N=58 (65 hips)  Mean age 49.8 years (SD 8.8) | Mean follow up 11.1 years (range 10-13.4)  N=7 lost to follow up (13.5%)  N=20 (34.5%); 19 (29%); 21 (32%)  Asymptomatic loosening assessed  HHS; X-ray changes  No cost information | Implant survival. Despite excellent fixation, the high rate of polyethylene wear and osteolysis in osteonecrosis is challenging |
| Mu et al. 201679  China, 1999-2009  Single centre, not consecutive patients  Retrospective case series  7/16  *J. Arthroplasty* | Uncemented THA in patients with developmental dysplasia  N=64 (78 hips)  Mean age 35.8 years (range 16-56) | Mean follow up 5.8 years (range 3.25-8.2)  N=6 lost to follow up (9.4%)  N=6 (9.4%); 0; 6 (9.4%)  Unclear if asymptomatic loosening assessed  HHS  No cost information | Implant survival. Midterm results for uncemented THA in patients with Crowe IV–Hartofilakidis Type III developmental dysplasia were satisfactory but intraoperative fracture and polyethylene wear were major complications |
| Nakamura et al. 201180  Japan, 1988-1995  Single centre, consecutive patients  Retrospective case series  9/16  *J. Arthroplasty* | Uncemented THA  N=58 (66 hips)  Mean age 58 years (range 34-80) | Mean follow up 15.1 years (range 12-20)  N=7 lost to follow up (10.6%)  N=12 (18%); 0; 12 (18%)  Asymptomatic loosening not assessed  HHS; X-ray changes  No cost information | Implant survival. Uncemented cylindrical stem gave good clinical and radiological results in patients with a small physique |
| Nakashima et al. 201381  Japan, 1998-2001  Single centre, unclear if consecutive patients, not contemporary groups  Retrospective case series  8/16  *J. Orthopaedic Science* | Uncemented MoP THA with XL polyethylene or conventional polyethylene  N=123 (131 hips)  Mean age 61.9 years (SD 9.2) | Mean follow up 12.25 years (10 or more)  8.70% lost to follow up  N=15 (11.5%); 1 (0.8%); 15 (11.5)  Unclear if asymptomatic loosening assessed  JOA; X-ray changes  No cost information | Implant survival. Low wear rates with XL polyethylene |
| Nikolaou et al. 201182  Canada, 1997-2003  Single centre, unclear if consecutive patients  Prospective case series  9/16  *Bulletin of the NYU Hospital for Joint Diseases* | Uncemented MoM THA  N=166 (193 hips)  Mean age 50 years (range 17-66) | Mean follow up 7 years (range 5-11)  Loss to follow up unclear  N=13 (6.7%); 10 (5.2%); 13 (6.7%)  Asymptomatic loosening not assessed  HHS, UCLA; X-ray changes  No cost information | Implant survival. Metal ion levels stabilised after 4-5 years. MoM showed excellent survivorship at 5-11 year follow up |
| Nishino et al. 201383  Japan, 1999-2001  Single centre, not consecutive patients  Retrospective case series  7/16  *J. Arthroplasty* | Uncemented THA  N=44 (53 hips)  Mean age 59 years (33-80) | Mean follow up 11.1 years (range 10-12.5)  N=3 lost to follow up (7%)  N=1 (2%); 0; 19 (36%)  Asymptomatic loosening assessed  JOA; X-ray changes  No cost information | Stress shielding. Severe stress shielding was observed in nearly half of the cases |
| Oe et al. 201684  Japan, 2001-2013  Single centre, consecutive patients, contemporary groups  Prospective case series  11/16  *International Orthopaedics* | Cemented THA with 3 bulk bone graft techniques  N=87 (101 hips)  Mean age 57-58 years (range 23-75) | Mean follow up 11 years (range 10-14)  N=25 lost to follow up (28.7%)  N=0; 0; 0  Asymptomatic loosening assessed  X-ray changes  No cost information | Radiographic outcomes. All bone grafts acquired trabecular reorientation, with no requirement for revision for aseptic or radiological loosening  *These bone graft techniques will be effective for improving the management of dysplasia in cemented THA by providing both acetabular reconstruction and cement containment.* |
| Oh et al. 200685  USA, 1987-2001  Single centre, consecutive patients  Retrospective case series  10/16  *Clinical Orthopaedics & Related Research* | Uncemented THA  N=43 (59 hips)  Mean age 28.7 years (range 14-56) | Mean follow up 7.1 years (range 3-15.6)  N=6 lost to follow up (14%)  N=9 (16.3%); 8 (13.5%); 9 (16.3%)  Unclear if asymptomatic loosening assessed  HHS; X-ray changes  No cost information | Implant survival. With the use of a small uncemented polyethylene liner, wear and osteolysis remain challenges |
| Ohishi et al. 201686  Japan, 1998-2010  Single centre, consecutive patients, contemporary groups  Retrospective case series  9/16  *International Orthopaedics* | Uncemented THA for patients treated with femoral osteotomy for hip dysplasia  N=63 (66 hips)  Mean age 69.8 years | Mean follow up 7.3 years  N=0 lost to follow up  N=2 (3%); 0; 7 (10.6)  Asymptomatic loosening assessed  Postel-Merle d’Aubigné; X-ray changes  No cost information | Clinical outcomes. Acceptable outcomes with uncemented stem in most patients, but perioperative femoral fracture was a major complication |
| Ollivier et al. 201687  USA, 1992-2005  Single centre, consecutive patients, contemporary groups  Retrospective case series  8/16  *J. Arthroplasty* | Uncemented THA in developmental dysplasia  N=24 (28 hips)  Mean age 48 years (range 30-72) | Mean follow up 10 years (range 0.8-14.5)  N=4 lost to follow up (8%)  N=0; 0; 8 (28.6%)  Asymptomatic loosening assessed  HHS; X-ray changes  No cost information | Revision. High success rate and stable clinical improvement for uncemented THA with subtrochanteric femoral shortening osteotomy in patients with a high hip dislocation secondary to developmental dysplasia |
| Persson et al. 200588  Sweden, 1987-1989  2 centres, not consecutive patients, contemporary groups  Prospective RCT  18/24  *Acta Orthopaedica* | Cemented THA with patients randomised to ibuprofen or placebo  N=144 (144 hips)  Age not reported | Mean follow up 10 years  N=39 lost to follow up (27%)  N=13 (9%); 9 (6.3%); 22 (15.3%)  Asymptomatic loosening assessed  X-ray changes  No cost information | Heterotopic ossification. Ibuprofen associated with high risk of revisions  *10 out of 11 revisions that were performed for aseptic loosening or femur fracture occurred in the ibuprofen-treated groups* |
| Pollard et al. 200689  UK, 1996-2001  Single centre, not consecutive patients, not contemporary groups  Retrospective case-control  14/24  *The Bone & Joint Journal (Br)* | Hybrid MoM THA or resurfacing  N=108 hips  Mean age 50 years (range 18-67) | Mean follow up 6.6 years (range 3.6-10)  9.5% lost to follow up  N=0; 0; 4 (8%)  Asymptomatic loosening assessed  OHS, UCLA; X-ray changes  No cost information | Radiological outcomes. Both groups demonstrated impending failure based on polyethylene wear and osteolysis, migration of the femoral component and other radiological changes. |
| Raj et al. 200890  UK, 1990-1992  Multicentre, not consecutive patients  Prospective case series  9/16  *Archives of Orthopaedic & Trauma Surgery* | Uncemented THA  N=36 (38 hips)  Mean age 51 years (range 23-67) | Mean follow up 12.25 years (range 12-14)  58% lost to follow up  N=28 (74%); 26 (68%); 28 (74%)  Unclear if asymptomatic loosening assessed  OHS; X-ray changes  No cost information | Implant survival. Corin C-Fit uncemented THA has high failure rate  *We believe this implant should not be used and patients who have had this form of total hip arthroplasty should be kept under regular review* |
| Rajakulendran et al. 201591  UK, 1997-2001  Single centre, not consecutive patients  Prospective case series  11/16  *J. Arthroplasty* | Cemented/ hybrid THA  N=98 (110 hips)  Mean age 73.5 years (range 65.1-84.8) | Mean follow up 8.9 years (SD 2.2)  N=29 lost to follow up (30%)  N=4 (3.6%); 1 (1%); 4 (3.6%)  Unclear if asymptomatic loosening assessed  OHS; X-ray changes  No cost information | Clinical and radiographic outcomes. 10-year results of the Tri-taper stem are comparable to other polished, tapered femoral stems |
| Saito et al. 200992  Japan, 1996-2001  Single centre, unclear if consecutive patients  Prospective case series  11/16  *J. Orthopaedic Surgery* | Uncemented THA  N=77 (84 hips)  Mean age 61 years (range 24-87) | Mean follow up 6.5 years (range 4.8-9.6)  Loss to follow up not reported  N=2 (3%); 0; 3 (4%)  Unclear if asymptomatic loosening assessed  JOA; X-ray changes  No cost information | Implant survival. Clinical and radiological outcomes of the Opti-Fix THA were favourable |
| Sanz-Reig et al. 201193  Spain, 1992-1998  Single centre, not consecutive patients  Prospective case series  11/16  *J. Orthopaedic Surgery* | Uncemented THA  N=149 (168 hips)  Mean age 71 years (range 65-88) | Mean follow up 13 years (range 10-15.25)  N=39 lost to follow up (26.2%)  N=21 (12.5%); 19 (11.3%); 21 (12.5%)  Unclear if asymptomatic loosening assessed  WOMAC, SF-12; X-ray changes  No cost information | Implant survival.  *The long-term outcome of the Perfecta cementless stem was good; most major complications occurred in the cup.* |
| Sato et al. 201694  Japan, 1994-1996  Single centre, consecutive patients, not contemporary groups  Retrospective case series  15/24  *J. Arthroplasty* | Uncemented THA with or without HA coating of acetabular components  N=163 (183 hips)  Mean age 60.1 years (SE 0.8) | Mean follow up 19.3 years (range 18.6-20.8)  N=54 lost to follow up (33%)  N=15 (8.2%); 4 (2.2%); 15 (8.2%)  Asymptomatic loosening not assessed  Postel-Merle d’Aubigné; X-ray changes  No cost information | Revision. No beneficial or adverse effects attributable to HA coating |
| Schwarzkopf et al. 201295  USA, 1998-1992  Single centre, consecutive patients  Prospective case series  10/16  *J. Arthroplasty* | Uncemented bilateral THA with HA coating  N=31 (62 hips)  Mean age 50 years (range 18-67) | Mean follow up 17 years (range 4-23)  N=4 lost to follow up (13%)  N=13 (21%); not stated; not stated  Asymptomatic loosening not assessed  WOMAC  No cost information | Implant survival. Bilateral uncemented THA can provide satisfactory long-term clinical, radiological, and functional outcomes even with older-generation polyethylene liners and stem designs |
| Seo et al. 201696  South Korea, 2001-2008  Single centre, unclear if consecutive patients, contemporary groups  Retrospective case series  5/16  *Hip International* | Cementless CoC THA  N=300 (310 hips)  Mean age 54.6 years (range 23-87) | Mean follow up 8.9 years (range 6.5-15)  Loss to follow up not reported  N=12 (3.9%); 0; 12 (3.9%)  Asymptomatic loosening assessed  HHS; X-ray changes  No cost information | Clinical outcome. Clinical outcomes for CoC THA were satisfactory. Still problems including ceramic fracture and squeaking. |
| Shaju et al. 200597  Ireland, 1987-1989  Single centre, consecutive patients, contemporary groups  Retrospective case series  7/16  *J. Arthroplasty* | Cemented THA with 22mm or 32mm heads  N=117  Mean age 72 and 78 years (range 55-86) | Mean follow up 11years (range 10.1-12.3)  N=0 lost to follow up  N=0; 0; 0  Asymptomatic loosening assessed  HHS; X-ray changes  No cost information | Radiographic and clinical outcomes. Radiological evidence of prosthetic loosening did not correlate well with clinical evaluation of the hip  *The other conclusion that can be drawn from our study is that radiological evidence of loosening does not necessarily have to correlate with clinical symptoms in long-term follow-ups.* |
| Song et al. 201298  South Korea, 1996-2000  Single centre, not consecutive patients  Retrospective case series  7/16  *International Orthopaedics* | Uncemented THA  N=75 (81 hips)  Mean age 59.4 years (range 36-64) | Mean follow up 11.4 years (range 10-15)  Loss to follow up not reported  N=2 (2.4%); 1 (1.2%); 2 (2.4%)  Asymptomatic loosening not assessed  HHS, Postel-Merle d’Aubigné; X-ray changes  No cost information | Radiographic and clinical outcome. Clinical and radiological evaluations of THA using the Mallory-Head system showed good results |
| Streit et al. 201199  Germany, 1985-1989  Single centre, consecutive patients  Retrospective case series  10/16  *The Bone & Joint Journal (Br)* | Uncemented THA  N=326 (354 hips)  Mean age 57 years (range 13-81) | Mean follow up 17 years (range 15-20)  N=8 lost to follow up (2.3 %)  N=35 (9.9%); 17 (4.8%); 39 (11%)  Asymptomatic loosening assessed  X-ray changes  No cost information | Peri-prosthetic fracture. The uncemented CLS Spotorno stem is associated with significant numbers of failures due to peri-prosthetic femoral fracture |
| Suehara et al. 2010100  Japan, 1994-1998  Prospective case series  11/16  *J. Arthroplasty* | Uncemented THA  N=47 (51 hips)  Mean age 61 years (range 30-82) | Mean follow up 10.8 years (range 7-13.3)  N=6 lost to follow up (11.8%)  N=0; 0; 2 (3.9%)  Asymptomatic loosening assessed  HHS, SF-36; X-ray changes  No cost information | Implant survival. 10-year survival of the Richards Modular Hip System prosthesis was good and no revisions of the stem were performed, osteolysis was an issue in the distal stem |
| Surace et al. 2015101  USA, 1999-2004  Single centre, consecutive patients, contemporary groups  Prospective case series  18/24  *Orthopedics* | Uncemented THA with XL or standard polyethylene liners  N=88  Mean age 68 years (range 46-83) | Mean follow up 8.67 years (range 5.5-11)  N=0 lost to follow up  N=2 (2.3%); 1 (1.1%); 2 (2.3%)  Unclear if asymptomatic loosening assessed  HHS; X-ray changes  No cost information | Osteolysis. XL polyethylene had a significantly greater wear reduction than standard polyethylene in primary THA  *This study shows that XLPE is associated with a significant wear reduction over standard polyethylene in primary total hip arthroplasty.* |
| Synder et al. 2012102  Poland, 1985-1999  Single centre, consecutive patients  Retrospective case series  9/16  *International Orthopaedics* | Uncemented CoC THA  N=188 (220 hips)  Mean age 44.5 years (range 20-70) | Mean follow up 19.6 years (range 12.3- 26.7)  N=0 lost to follow up  N=16 (7.3%); not stated; 16 (7.3%)  Unclear if asymptomatic loosening assessed  Postel-Merle d’Aubigné  No cost information | Implant survival. Mittelmeier THA associated with low incidence of loosened prosthesis components |
| Takenaga et al. 2012103  USA, 1994-1999  Single centre, consecutive patients  Prospective case series  15/24  *J. Bone & Joint Surgery (Am)* | Uncemented THA  N=100 (115 hips)  Mean age 40.1 years (range 17-50) | Mean follow up 11.4 years (range 8-14)  N=33 lost to follow up (29%)  N=17 (15%); 0; 17 (15%)  Asymptomatic loosening assessed  WOMAC, UCLA, TEGNER; X-ray changes  No cost information | Implant survival. Uncemented THA showed good fixation in an active, younger population.  *While we are encouraged by the significant improvement of cementless total hip arthroplasty in terms of implant fixation at ten years, we are aware of the potential for more revisions for polyethylene wear with longer-term follow-up. This study demonstrates the need to appropriately counsel young patients who are considering total hip replacement for disabling hip arthritis.* |
| Tsai et al. 2016104  Taiwan, 1994-2011  Single centre, not consecutive patients, unclear if contemporary groups  Retrospective case series  12/24  *Artificial Organs* | Cemented and uncemented THA or bipolar hemiarthroplasty for failed intertrochanteric fractures  N=79  Mean age 75.1 years (SD 10.6) | Mean follow up 6.3 years (range 2-20)  Loss to follow up not reported  N=7 (8.9%); 4 (5%); 60 (76%)  Asymptomatic loosening not assessed  HHS; X-ray changes  No cost information | Dislocation. Comparison of THA and bipolar hemiarthroplasty for failed intertrochanteric fractures inconclusive regarding dislocation rate |
| Tsukada et al. 2013105  Japan, 2000-2004  Single centre, not consecutive patients  Retrospective case series  6/16  *Archives of Orthopaedic & Trauma Surgery* | Uncemented CoC THA  N=124  Mean age 61.4 years (SD 9.7, range 35-84) | Mean follow up 10.1 years (range 8-12.8)  Loss to follow up not reported  N=6 (4.8%); 0; 6 (4.8%)  Asymptomatic loosening not assessed  X-ray changes  No cost information | Osteolysis. Uncemented CoC THA associated with no detectable wear or osteolysis at 10 year follow up |
| Tsukada et al. 2016106  Japan, 2000-2004  Single centre, not consecutive patients,  Retrospective case series  7/16  *J. Arthroplasty* | Uncemented THA in patients with secondary osteoarthritis due to developmental dysplasia  N=134  Mean age 61.4 years (range 35-84) | Mean follow up 11.9 years (range 10-15)  N=19 lost to follow up (14.2%)  N=7 (5.2%); 1 (0.8%); 7 (5.2%)  Unclear if asymptomatic loosening assessed  Postel-Merle d’Aubigné; X-ray changes  No cost information | Radiographic. No evidence of aseptic loosening was observed |
| Vendittoli et al. 2013107  Canada, 2003-2006  Single centre, consecutive patients, contemporary groups  Prospective RCT  19/24  *The Bone & Joint Journal (Br)* | Uncemented MoM THA or resurfacing  N=203  Mean age 51.0 and 49.2 years (range 23-65) | Mean follow up 8 years (range 6.6-9.3  N=18 lost to follow up (9%)  N=10 (5%); 7 (3.5%); not stated  Asymptomatic loosening assessed  WOMAC, UCLA, Postel-Merle d’Aubigné; X-ray changes  No cost information | Clinical and radiographic outcomes. Revision rates and functional scores were similar in uncemented MoM THA and resurfacing at 8 year follow up |
| Wang et al. 2017108  China, 2002-2010  Single centre, consecutive patients, contemporary groups  Retrospective case series  7/16  *J. Arthroplasty* | Uncemented THA in patients with sub trochanteric shortening osteotomy in Crowe type IV developmental dysplasia  N=62 (76 hips)  Mean age 46.5 years (range 19-73) | Mean follow up 10 years (range 6.6-13.2)  Loss to follow up not reported  N=2 (2.6%); 2 (2.6%); 10 (13.2%)  Asymptomatic loosening assessed  HHS; X-ray changes  No cost information | Clinical outcomes. Good fixation and satisfactory clinical outcomes for modular THA combined with transverse sub trochanteric shortening osteotomy in patients with Crowe type IV developmental dysplasia |
| Wang et al. 2016109  China, 2003-2008  Single surgeon, unclear if consecutive patients, contemporary groups  Retrospective case series  7/16  *Arthroplasty Today* | Uncemented CoC THA  N=93 (100 hips)  Mean age 39 years (SD 8.2, range 19-50) | Mean follow up 9.4 years (SD 1.6 range 7-12)  N=3 lost to follow up (3%)  N=3 (3%); 0; 7 (7%)  Asymptomatic loosening assessed  HHS, UCLA; X-ray changes  No cost information | Clinical outcomes. Promising clinical results, high survival rates and no evidence of osteolysis for CoC THA in younger patients |
| Yamauchi et al. 2012110  Japan, 2002-2004  Single centre, consecutive patients, contemporary groups (bilateral comparison)  Prospective RCT  20/24  *J. Arthroplasty* | Uncemented bilateral THA with tapered or cylindrical stem  N=21 (42 hips)  Mean age 59.2 years (range 47-77) | Mean follow up 7 years (range 6-8)  N=0 lost to follow up  N=0; 0; 0  Asymptomatic loosening not assessed  JOA; X-ray changes  No cost information | Bone response. Good clinical and radiographic results for both THA implants but more distal loading with tapered compared with cylindrical stem |
| Yeung et al. 2012111  Australia, 1997-1999  Single centre, consecutive patients  Prospective case series  9/16  *J. Bone & Joint Surgery (Am)* | Uncemented CoC THA  N=283 (301 hips)  Mean age 58 years | Mean follow up 10.9 years (range 10.1-12.8)  N=48 lost to follow up (16%)  N=9 (3%); 1 (0.3%); 9 (3%)  Asymptomatic loosening assessed  HHS; X-ray changes  No cost information | Implant survival. At 10 years, uncemented CoC THA had good survival, function and low wear |
| Yoo et al. 2009112  Korea, 1995-2003  Single centre, consecutive patients  Retrospective case series  10/16  *Haemophilia* | Uncemented THA in patients with haemophilic arthropathy  N=23 (27 hips)  Mean age 36 years (range 24-52) | Mean follow up 7.67 years (range 5-13)  N=1 lost to follow up (4.4%)  N=2 (7.4%); 1 (3.7%); 3 (11.1%)  Asymptomatic loosening assessed  HHS; X-ray changes  No cost information | Clinical outcomes. Satisfactory functional results for uncemented THA in haemophilia |
| Zhang et al. 2008113  China, 1998-2001  Single centre, unclear if consecutive patients, contemporary groups  Prospective case series  17/24  *J. Arthroplasty* | Uncemented THA in patients with osteonecrosis  N=71 (80 hips)  Mean age 47.3 years (range 21-79) | Mean follow up 6.5 years (range 5-8.2)  N=5 lost to follow up (7%)  N=1 (1.3%); 1 (1.3%); 1 (1.3%)  Asymptomatic loosening assessed  HHS; X-ray changes  No cost information | Clinical and radiographic outcomes. In patients with osteonecrosis of the femoral head, uncemented THA showed satisfactory clinical and radiographic outcomes at 6.5 years  *We have also realized that polyethylene wear of the liner and the late development of osteolysis are still our great concerns because our follow-up was not long enough.* |
| Zwartele et al. 2008114  The Netherlands, 1996-1999  Single centre, consecutive patients, contemporary groups  Prospective case series  17/24  *Archives of Orthopaedic & Trauma Surgery* | Uncemented THA in patients with osteoarthritis and inflammatory arthritis  N= 374 (416 hips)  Mean age osteoarthritis 68.1 years (range 37-90); inflammatory arthritis 58.5 years (range 15 to 85) | Mean follow up 5.9 years in osteoarthritis (range 4-9), 5.8 years in inflammatory arthritis (range 4-8)  N=30 lost to follow up (8%)  N=11 (2.6%); 3 (0.7%); 11 (2.6%)  Asymptomatic loosening not assessed  HHS; X-ray changes  No cost information | Cup fixation. Low rates of aseptic loosening in both groups at mid-term follow up.  *However, after 6-10 years, in the inflammatory arthritis group failure of the cup due to aseptic loosening did occur once and failure due to osteolysis did occur three times while these types of failures did not occur in the osteoarthritis group.* |

Key:

| **ARMD** | Adverse reaction to metal debris |
| --- | --- |
| **AVN** | Avascular necrosis |
| **CI** | Confidence interval |
| **CoC** | Ceramic on ceramic (bearing surface) |
| **CoCr** | Cobalt chrome |
| **CoP** | Ceramic on polyethylene (bearing surface) |
| **DDH** | Developmental dysplasia of the hip |
| **EQ-5D** | EuroQol health-related quality of life questionnaire |
| **HA** | Hydroxyapatite |
| **HHS** | Harris hip score |
| **HOOS** | Hip osteoarthritis outcome score |
| **HXL** | Highly cross-linked polyethylene |
| **JOA** | Japanese Orthopaedic Association score |
| **MHRA** | Medicines and healthcare regulatory agency |
| **MoM** | Metal on metal (bearing surface) |
| **MoP** | Metal on polyethylene (bearing surface) |
| **OA** | Osteoarthritis |
| **OHS** | Oxford hip score |
| **PE** | Polyethylene |
| **RAND-12** | RAND 12 item health survey, derived from RAND 36 |
| **RAND-36** | Veterans RAND 36 Item Health Survey |
| **RCT** | Randomised controlled trial |
| **SF12** | Short form 12 item health survey (Medical Outcomes Study, derived from RAND 12) |
| **THA** | Total hip arthroplasty |
| **Ti** | Titanium |
| **UCLA** | University of California, Los Angeles activity scale |
| **UK** | United Kingdom |
| **VAS** | Visual analogue scale |
| **WOMAC** | Western Ontario and McMaster Universities Osteoarthritis Index |
| **XL** | Cross-linked polyethylene |

**References**

1. Alfonso DT, Howell RD, Caceres G, Kozlowski P, Di Cesare PE. Total hip arthroplasty in the underweight. *J Arthroplasty*. 2008;23:956-959.

2. Amlie E, Hovik O, Reikeras O. Dislocation after total hip arthroplasty with 28 and 32-mm femoral head. *Journal of Orthopaedics and Traumatology*. 2010;11:111-115.

3. Ancelin D., Reina N., Cavaignac E., Delclaux S., Chiron P. Total hip arthroplasty survival in femoral head avascular necrosis versus primary hip osteoarthritis: Case-control study with a mean 10-year follow-up after anatomical cementless metal-on-metal 28-mm replacement. *Orthopaedics and Traumatology: Surgery and Research*. 2016;102:1029-1034.

4. Angadi DS, Brown S, Crawfurd EJ. Cemented polyethylene and cementless porous-coated acetabular components have similar outcomes at a mean of seven years after total hip replacement: A prospective randomised study. *J Bone Joint Surg Br*. 2012;94-B:1604-1610.

5. Ateschrang A, Weise K, Weller S, Stockle U, de Zwart P, Ochs BG. Long-term results using the straight tapered femoral cementless hip stem in total hip arthroplasty: A minimum of twenty-year follow-up. *J Arthroplasty*. 2014;29:1559-1565.

6. Avery PP, Baker RP, Walton MJ, et al. Total hip replacement and hemiarthroplasty in mobile, independent patients with a displaced intracapsular fracture of the femoral neck: A seven- to ten-year follow-up report of a prospective randomised controlled trial. *J Bone Joint Surg Br*. 2011;93:1045-1048.

7. Baltopoulos P, Tsintzos C, Papadakou E, Karagounis P, Tsironi M. Hydroxyapatite-coated total hip arthroplasty: The impact on thigh pain and arthroplasty survival. *Acta Orthop Belg*. 2008;74:323-331.

8. Baumann B, Hendrich C, Barthel T, et al. 9- to 11-year results of cemented titanium mueller straight stem in total hip arthroplasty. *Orthopedics*. 2007;30:551-557.

9. Beaupre L.A., AlHoukail A., Johnston DWC. A randomized trial comparing ceramic-on-ceramic bearing vs ceramic-on-crossfire-polyethylene bearing surfaces in total hip arthroplasty. *J Arthroplasty*. 2016;31:1240-1245.

10. Belmont PJ,Jr, Powers CC, Beykirch SE, Hopper RH,Jr, Engh CA,Jr, Engh CA. Results of the anatomic medullary locking total hip arthroplasty at a minimum of twenty years. A concise follow-up of previous reports. *J Bone Joint Surg Am*. 2008;90-A:1524-1530.

11. Berend KR, Hanna J, Smith TM, Mallory TH, Lombardi AV. Acute hip arthroplasty for the treatment of intertrochanteric fractures in the elderly. *J Surg Orthop Adv*. 2005;14:185-189.

12. Bernstein M, Desy NM, Petit A, Zukor DJ, Huk OL, Antoniou J. Long-term follow-up and metal ion trend of patients with metal-on-metal total hip arthroplasty. *Int Orthop*. 2012;36:1807-1812.

13. Biant LC, Bruce WJ, Assini JB, Walker PM, Walsh WR. Primary total hip arthroplasty in severe developmental dysplasia of the hip. ten-year results using a cementless modular stem. *J Arthroplasty*. 2009;24:27-32.

14. Bidar R, Kouyoumdjian P, Munini E, Asencio G. Long-term results of the ABG-1 hydroxyapatite coated total hip arthroplasty: Analysis of 111 cases with a minimum follow-up of 10 years. *Orthop Traumatol Surg Res*. 2009;95:579-587.

15. Boden H, Salemyr M, Skoldenberg O, Ahl T, Adolphson P. Total hip arthroplasty with an uncemented hydroxyapatite-coated tapered titanium stem: Results at a minimum of 10 years' follow-up in 104 hips. *J Orthop Sci*. 2006;11:175-179.

16. Boyer B, Philippot R, Geringer J, Farizon F. Primary total hip arthroplasty with dual mobility socket to prevent dislocation: A 22-year follow-up of 240 hips. *Int Orthop*. 2012;36:511-518.

17. Broeke RH, Harings SE, Emans PJ, Jutten LM, Kessels AG, Geesink RG. Randomized comparison between the cemented scientific hip prosthesis and omnifit: 2-year DEXA and minimum 10-year clinical follow-up. *J Arthroplasty*. 2013;28:1354-1361.

18. Busato A, Roder C, Herren S, Eggli S. Influence of high BMI on functional outcome after total hip arthroplasty. *Obesity Surg*. 2008;18:595-600.

19. Buttaro M.A., Slullitel P.A., Mansilla A.M.G., et al. Long-term outcome of unconstrained primary total hip arthroplasty in ipsilateral residual poliomyelitis. *Orthopedics*. 2017;40:e255-e261.

20. Carlson S.W., Goetz D.D., Liu S.S., Greiner J.J., Callaghan JJ. Minimum 10-year follow-up of cementless total hip arthroplasty using a contemporary triple-tapered titanium stem. *J Arthroplasty*. 2016;31:2231-2236.

21. Caton J, Prudhon JL. Over 25 years survival after Charnley's total hip arthroplasty. *Int Orthop*. 2011;35:185-188.

22. Chandran P, Azzabi M, Miles J, Andrews M, Bradley J. Furlong hydroxyapatite-coated hip prosthesis vs the charnley cemented hip prosthesis. *J Arthroplasty*. 2010;25:52-57.

23. Chevillotte C, Pibarot V, Carret JP, Bejui-Hugues J, Guyen O. Nine years follow-up of 100 ceramic-on-ceramic total hip arthroplasty. *Int Orthop*. 2011;35:1599-1604.

24. Choy WS, Kim KJ, Lee SK, Bae KW, Hwang YS, Park CK. Ceramic-on-ceramic total hip arthroplasty: Minimum of six-year follow-up study. *Clin Orthop Surg*. 2013;5:174-179.

25. Colo E, Rijnen WHC, Gardeniers JWM, van Kampen A, Schreurs BW. Satisfying results of primary hip arthroplasty in patients with hip dysplasia at a mean followup of 20 years. *Clin Orthop*. 2016;474:2462-2468.

26. Corten K, Bourne RB, Charron KD, Au K, Rorabeck CH. Comparison of total hip arthroplasty performed with and without cement: A randomized trial. A concise follow-up, at twenty years, of previous reports. *J Bone Joint Surg Am*. 2011;93:1335-1338.

27. Costi K., Solomon L.B., McGee M.A., Rickman M.S., Howie DW. Advantages in using cemented polished tapered stems when performing total hip arthroplasty in very young patients. *J Arthroplasty*. 2017;32:1227-1233.

28. Danesh-Clough T, Bourne RB, Rorabeck CH, McCalden R. The mid-term results of a dual offset uncemented stem for total hip arthroplasty. *J Arthroplasty*. 2007;22:195-203.

29. D'Antonio JA, Capello WN, Naughton M. Ceramic bearings for total hip arthroplasty have high survivorship at 10 years. *Clin Orthop*. 2012;470:373-381.

30. Datir SP, Wynn-Jones CH. Staged bilateral total hip arthroplasty using rough and smooth surface femoral stems with similar design: 10-year survivorship of 48 cases. *Acta Orthop*. 2005;76:809-814.

31. de Kam DC, Gardeniers JW, Veth RP, Schreurs BW. Good results with cemented total hip arthroplasty in patients between 40 and 50 years of age. *Acta Orthop*. 2010;81:165-170.

32. de Witte PB, Brand R, Vermeer HG, van der Heide HJ, Barnaart AF. Mid-term results of total hip arthroplasty with the CementLess spotorno (CLS) system. *J Bone Joint Surg Am*. 2011;93:1249-1255.

33. Delaunay CP, Putman S, Puliero B, Begin M, Migaud H, Bonnomet F. Cementless total hip arthroplasty with metasul bearings provides good results in active young patients: A concise followup. *Clin Orthop*. 2016;474:2126-2133.

34. Emans PJ, Broeke RH, Van Mulken JM, Kuijer R, Van Rhijn LW, Geesink RG. Results of total hip arthroplasties in the young patient; further evidence for a barrier against articular wear debris by hydroxyapatite coatings. *Hip Int*. 2009;19:343-351.

35. Epinette JA, Asencio G, Essig J, Llagonne B, Nourissat C. Clinical results, radiological findings and survival of a proximally hydroxyapatite-coated hip ABG II stem at a minimum of ten years' follow-up: Results of a consecutive multicentre study of 1148 hips in 1053 patients. *Bone Joint J*. 2013;95-B:1610-1616.

36. Ferreira A., Aslanian T., Dalin T., Picaud J. Ceramic bearings with bilayer coating in cementless total hip arthroplasty. A safe solution. A retrospective study of one hundred and twenty six cases with more than ten years' follow-up. *Int Orthop*. 2017;41:893-899.

37. Gavaskar A.S., Gopalan H., Karthik B., Srinivasan P., Tummala NC. Delayed total hip arthroplasty for failed acetabular fractures: The influence of initial fracture management on outcome after arthroplasty. *J Arthroplasty*. 2017;32:872-876.

38. Greiner J.J., Callaghan J.J., Bedard N.A., Liu S.S., Goetz D.D., Mahoney CR. Metal-on-metal total hip arthroplasty at five to twelve years follow-up: A concise follow-up of a previous report. *J Arthroplasty*. 2016;31:1773-1778.

39. Hallan G, Lie SA, Havelin LI. High wear rates and extensive osteolysis in 3 types of uncemented total hip arthroplasty: A review of the PCA, the harris galante and the profile/tri-lock plus arthroplasties with a minimum of 12 years median follow-up in 96 hips. *Acta Orthop*. 2006;77:575-584.

40. Hartofilakidis G, Georgiades G, Babis GC. A comparison of the outcome of cemented all-polyethylene and cementless metal-backed acetabular sockets in primary total hip arthroplasty. *J Arthroplasty*. 2009;24(2):217-225.

41. Hartofilakidis G, Karachalios T, Georgiades G, Kourlaba G. Total hip arthroplasty in patients with high dislocation: A concise follow-up, at a minimum of fifteen years, of previous reports. *J Bone Joint Surg Am*. 2011;93:1614-1618.

42. Hernandez-Vaquero D, Suarez-Vazquez A, Fernandez-Lombardia J. Charnley low-friction arthroplasty of the hip. five to 25 years survivorship in a general hospital. *BMC Musculoskelet Disord*. 2008;9:69.

43. Higuchi Y., Hasegawa Y., Komatsu D., Seki T., Ishiguro N. Incidence of ceramic liner malseating after ceramic-on-ceramic total hip arthroplasty associated with osteolysis: A 5- to 15-year follow-up study. *J Arthroplasty*. 2017;32:1641-1646.

44. Higuchi Y., Hasegawa Y., Komatsu D., Seki T., Ishiguro N. Survivorship between 2 different ceramic-on-ceramic total hip arthroplasty with or without a metal-backed titanium sleeve bearing: A 5- to 14-year follow-up study. *J Arthroplasty*. 2017;32:155-160.

45. Huddleston JI, Harris AHS, Atienza CA, Woolson ST. Hylamer vs conventional polyethylene in primary total hip arthroplasty: A long-term case-control study of wear rates and osteolysis. *J Arthroplasty*. 2010;25:203-207.

46. Hui Z, Pei FX, Shen B, Yang J, Chen ZY, Huang Q. Total hip arthroplasty with a cementless acetabular component and a cemented femoral component in the treatment of chinese patients with femoral head necrosis. *J Arthroplasty*. 2008;23:1022-1030.

47. Hwang KT, Kim YH, Kim YS, Choi IY. Is second generation metal-on-metal primary total hip arthroplasty with a 28 mm head a worthy option?: A 12- to 18-year follow-up study. *J Arthroplasty*. 2013;28:1828-183.

48. Issa K., Harwin S.F., Malkani A.L., Bonutti P.M., Scillia A., Mont MA. Bariatric orthopaedics: Total hip arthroplasty in super-obese patients (those with a BMI of >=50 kg/m2). *Journal of Bone and Joint Surgery - American Volume*. 2016;98:180-185.

49. Issa K, Naziri Q, Maheshwari AV, Rasquinha VJ, Delanois RE, Mont MA. Excellent results and minimal complications of total hip arthroplasty in sickle cell hemoglobinopathy at mid-term follow-up using cementless prosthetic components. *J Arthroplasty*. 2013;28:1693-1698.

50. Ito H, Tanino H, Yamanaka Y, Nakamura T, Matsuno T. Hybrid total hip arthroplasty using specifically-designed stems for patients with developmental dysplasia of the hip. A minimum five-year follow-up study. *Int Orthop*. 2011;35:1289-1294.

51. Jenkins PJ, Clement ND, Hamilton DF, Gaston P, Patton JT, Howie CR. Predicting the cost-effectiveness of total hip and knee replacement: A health economic analysis. *Bone Joint J*. 2013;95-B:115-121. doi: 10.1302/0301-620X.95B1.29835.

52. Jialiang T, Zhongyou M, Fuxing P, Zongke Z, Bin S, Jing Y. Primary total hip arthroplasty with duraloc cup in patients younger than 50 years: A 5- to 7-year follow-up study. *J Arthroplasty*. 2009;24:1184-1187.

53. Kang JS, Moon KH, Kim RS, Park SR, Lee JS, Shin SH. Total hip arthroplasty using S-ROM prosthesis for dysplastic hip. *Yonsei Med J*. 2011;52:655-660.

54. Kang JS, Moon KH, Park SR, Choi SW. Long-term results of total hip arthroplasty with an extensively porous coated stem in patients younger than 45 years old. *Yonsei Med J*. 2010;51:100-103.

55. Kawano S, Sonohata M, Shimazaki T, Kitajima M, Mawatari M, Hotokebuchi T. Failure analysis of alumina on alumina total hip arthroplasty with a layered acetabular component: Minimum ten-year follow-up study. *J Arthroplasty*. 2013;28:1822-1827.

56. Kilicarslan K, Yalcin N, Karatas F, Catma F, Yildirim H. Cementless total hip arthroplasty for dysplastic and dislocated hips. *Eklem Hastalik Cerrahisi*. 2011;22:8-15.

57. Kim D-, Oh C-, Kim P-, Ihn J-, Kim S-. Total hip arthroplasty with the use of nonmodular cementless acetabular component. *J Arthroplasty*. 2005;20:632-638.

58. Kim YG, Kim SY, Park BC, Kim PT, Ihn JC, Kim ID. Uncemented harris-galante total hip arthroplasty in patients with osteonecrosis of the femoral head. A 10-16-year follow-up study. *Acta Orthop*. 2005;76:42-48.

59. Kim YH, Choi Y, Kim JS. Cementless total hip arthroplasty with ceramic-on-ceramic bearing in patients younger than 45 years with femoral-head osteonecrosis. *Int Orthop*. 2010;34:1123-1127.

60. Kim Y, Choi Y, Kim J. Cementless total hip arthroplasty with alumina-on-highly cross-linked polyethylene bearing in young patients with femoral head osteonecrosis. *Journal of Arthroplasty*. 2011;26:218-223.

61. Kim YH, Kim JS, Park JW, Joo JH. Periacetabular osteolysis is the problem in contemporary total hip arthroplasty in young patients. *J Arthroplasty*. 2012;27:74-81.

62. Kim Y.H., Park J.W., Kim JS. Long-term results of third-generation ceramic-on-ceramic bearing cementless total hip arthroplasty in young patients. *J Arthroplasty*. 2016;31:2520-2524.

63. Korovessis P, Petsinis G, Repanti M, Repantis T. Metallosis after contemporary metal-on-metal total hip arthroplasty. five to nine-year follow-up. *J Bone Joint Surg Am*. 2006;88:1183-1191.

64. Lainiala O, Eskelinen A, Elo P, Puolakka T, Korhonen J, Moilanen T. Adverse reaction to metal debris is more common in patients following MoM total hip replacement with a 36 mm femoral head than previously thought: Results from a modern MoM follow-up programme. *Bone Joint J*. 2014;96-B:1610-1617.

65. Le D, Smith K, Tanzer D, Tanzer M. Modular femoral sleeve and stem implant provides long-term total hip survivorship. *Clin Orthop*. 2011;469:508-513.

66. Lee JH, Lee BW, Lee BJ, Kim SY. Midterm results of primary total hip arthroplasty using highly cross-linked polyethylene: Minimum 7-year follow-up study. *J Arthroplasty*. 2011;26:1014-1019.

67. Li WC, Shih CH, Ueng SW, Shih HN, Lee MS, Hsieh PH. Uncemented total hip arthroplasty in chronic hemodialysis patients. *Acta Orthop*. 2010;81:178-182.

68. Lim BH, Lim SJ, Moon YW, Park YS. Cementless total hip arthroplasty in renal transplant patients. *Hip int*. 2012;22:516-520.

69. Little BS, Wixson RL, Stulberg SD. Total hip arthroplasty with the porous-coated anatomic hip prosthesis: Results at 11 to 18 years. *J Arthroplasty*. 2006;21:338-343.

70. Loughead JM, O'Connor PA, Charron K, Rorabeck CH, Bourne RB. Twenty-three-year outcome of the porous coated anatomic total hip replacement: A concise follow-up of a previous report. *J Bone Joint Surg Am*. 2012;94:151-155.

71. Lubbeke A, Garavaglia G, Barea C, Stern R, Peter R, Hoffmeyer P. Influence of patient activity on femoral osteolysis at five and ten years following hybrid total hip replacement. *Bone Joint J*. 2011;93-B:456-463.

72. Lubbeke A, Gonzalez A, Garavaglia G, et al. A comparative assessment of small-head metal-on-metal and ceramic-on-polyethylene total hip replacement. *Bone Joint J*. 2014;96-B:868-875.

73. Lusty PJ, Tai CC, Sew-Hoy RP, Walter WL, Walter WK, Zicat BA. Third-generation alumina-on-alumina ceramic bearings in cementless total hip arthroplasty. *J Bone Joint Surg Am*. 2007;89:2676-2683.

74. Maggs JL, Smeatham A, Whitehouse SL, Charity J, Timperley AJ, Gie GA. The exeter contemporary flanged cemented acetabular component in primary total hip arthroplasty. *Bone Joint J*. 2016;98-B:307-312.

75. Martz P., Maczynski A., Elsair S., Labattut L., Viard B., Baulot E. Total hip arthroplasty with dual mobility cup in osteonecrosis of the femoral head in young patients: Over ten years of follow-up. *Int Orthop*. 2017;41:605-610.

76. Matharu G.S., Nandra R.S., Berryman F., Judge A., Pynsent P.B., Dunlop DJ. Risk factors for failure of the 36 mm metal-on-metal pinnacle total hip arthroplasty system. 2017.

77. McLaughlin J.R., Lee KR. Total hip arthroplasty with an uncemented tapered femoral component in patients younger than 50 years of age: A minimum 20-year follow-up study. *J Arthroplasty*. 2016;31:1275-1278.

78. Min BW, Song KS, Bae KC, Cho CH, Lee KJ, Kim HJ. Second-generation cementless total hip arthroplasty in patients with osteonecrosis of the femoral head. *J Arthroplasty*. 2008;23:902-910.

79. Mu W, Yang D, Xu B, Mamtimin A, Guo W, Cao L. Midterm outcome of cementless total hip arthroplasty in Crowe IV-Hartofilakidis type III developmental dysplasia of the hip. *J Arthroplasty*. 2016;31:668-675.

80. Nakamura Y, Ohishi H, Kishiya M, Toh S. Total hip arthroplasty with an HPF stem: The radiological findings around the cementless anatomical-shape stem for developmental dysplasia of the hip. *J Orthop Sci*. 2011;16:364-368.

81. Nakashima Y, Sato T, Yamamoto T, et al. Results at a minimum of 10 years of follow-up for AMS and PerFix HA-coated cementless total hip arthroplasty: Impact of cross-linked polyethylene on implant longevity. *J Orthop Sci*. 2013;18:962-968.

82. Nikolaou VS, Petit A, Debiparshad K, Huk OL, Zukor DJ, Antoniou J. Metal-on-metal total hip arthroplasty - five- to 11-year follow-up. *Bull NYU Hosp Jt Dis*. 2011;69(Suppl 1):S77-83.

83. Nishino T, Mishima H, Kawamura H, Shimizu Y, Miyakawa S, Ochiai N. Follow-up results of 10-12 years after total hip arthroplasty using cementless tapered stem -- frequency of severe stress shielding with synergy stem in japanese patients. *J Arthroplasty*. 2013;28:1736-1740.

84. Oe K., Iida H., Kawamura H., et al. Long-term results of acetabular reconstruction using three bulk bone graft techniques in cemented total hip arthroplasty for developmental dysplasia. *Int Orthop*. 2016;40:1949-1954.

85. Oh KJ, Imrie S, Hwang K, Ramachandran R, Shegog M, Goodman SB. Total hip arthroplasty using the miniature anatomic medullary locking stem. *Clin Orthop*. 2006;447:85-91.

86. Ohishi M., Nakashima Y., Yamamoto T., et al. Cementless total hip arthroplasty for patients previously treated with femoral osteotomy for hip dysplasia: The incidence of periprosthetic fracture. *Int Orthop*. 2016;40:1601-1606.

87. Ollivier M., Abdel M.P., Krych A.J., Trousdale R.T., Berry DJ. Long-term results of total hip arthroplasty with shortening subtrochanteric osteotomy in Crowe IV developmental dysplasia. *J Arthroplasty*. 2016;31:1756-1760.

88. Persson PE, Nilsson OS, Berggren AM. Do non-steroidal anti-inflammatory drugs cause endoprosthetic loosening? A 10-year follow-up of a randomized trial on ibuprofen for prevention of heterotopic ossification after hip arthroplasty. *Acta orthopaedica*. 2005;76:735-740.

89. Pollard TCB, Baker RP, Eastaugh-Waring SJ, Bannister GC. Treatment of the young active patient with osteoarthritis of the hip: A five- to seven-year comparison of hybrid total hip arthroplasty and metal-on-metal resurfacing. *Bone Joint J* 2006;88-B:592-600.

90. Raj D, Jaiswal PK, Sharma BL, Fergusson CM. Long term results of the corin C-fit uncemented total hip arthroplasty in young patients. *Arch Orthop Trauma Surg*. 2008;128:1391-1395.

91. Rajakulendran K, Strambi F, Ruggeri R, Field RE. A cannulated tri-tapered femoral stem for total hip arthroplasty: Clinical and radiological results at ten years. *J Arthroplasty*. 2015;30:1772-1776.

92. Saito M, Takahashi KA, Fujioka M, et al. Total hip arthroplasty using proximal porous coating stem with distal sleeve: Mid-term outcome. *J Orthop Surg*. 2009;17:36-41.

93. Sanz-Reig J, Lizaur-Utrilla A, Llamas-Merino I, Lopez-Prats F. Cementless total hip arthroplasty using titanium, plasma-sprayed implants: A study with 10 to 15 years of follow-up. *J Orthop Surg*. 2011;19:169-173.

94. Sato T., Nakashima Y., Komiyama K., Yamamoto T., Motomura G., Iwamoto Y. The absence of hydroxyapatite coating on cementless acetabular components does not affect long-term survivorship in total hip arthroplasty. *J Arthroplasty*. 2016;31:1228-1232.

95. Schwarzkopf R, Olivieri P, Jaffe WL. Simultaneous bilateral total hip arthroplasty with hydroxyapatite-coated implants: A 20-year follow-up. *J Arthroplasty*. 2012;27:1364-1369.

96. Seo B.H., Ryu D.J., Kang J.S., Moon KH. Primary total hip arthroplasty using 3rd generation ceramic-on-ceramic articulation. *Hip Int*. 2016;26:468-473.

97. Shaju KA, Hasan ST, D'Souza LG, McMahon B, Masterson EL. The 22-mm vs the 32-mm femoral head in cemented primary hip arthroplasty long-term clinical and radiological follow-up study. *J Arthroplasty*. 2005;20:903-908.

98. Song JH, Kim DH, Kim J. Total hip replacement arthroplasty with mallory-head system--minimum ten-year follow-up results. *Int Orthop*. 2012;36:2055-2059.

99. Streit MR, Merle C, Clarius M, Aldinger PR. Late peri-prosthetic femoral fracture as a major mode of failure in uncemented primary hip replacement. *J Bone Joint Surg Br*. 2011;93-B:178-183.

100. Suehara H, Fujioka M, Inoue S, Takahashi K, Ueshima K, Kubo T. Clinical and radiographic results for the richards modular hip system prosthesis in total hip arthroplasty: Average 10-year follow-up. *J Arthroplasty*. 2010;25:369-374.

101. Surace MF, Monestier L, Vulcano E, Harwin SF, Cherubino P. Conventional versus cross-linked polyethylene for total hip arthroplasty. *Orthopedics*. 2015;38:556-561.

102. Synder M, Drobniewski M, Sibinski M. Long-term results of cementless hip arthroplasty with ceramic-on-ceramic articulation. *Int Orthop*. 2012;36:2225-2229.

102. Takenaga RK, Callaghan JJ, Bedard NA, Liu SS, Klaassen AL, Pedersen DR. Cementless total hip arthroplasty in patients fifty years of age or younger: A minimum ten-year follow-up. *J Bone Joint Surg Am*. 2012;94:2153-2159.

104. Tsai S.W., Chen C.F., Wu P.K., Huang C.K., Chen W.M., Chang MC. Does implant selection impact postoperative complications following hip arthroplasty for failed intertrochanteric fractures? A retrospective comparative study. *Artificial Organs*. 2016;40:798-804.

105. Tsukada S, Wakui M, Matsueda M. Uncemented third-generation ceramic-on-ceramic total hip arthroplasty using metal acetabular shell with direct taper locking liner. *Arch Orthop Trauma Surg*. 2013;133:861-868.

106. Tsukada S, Wakui M. A case series of total hip arthroplasty using cementless hip stem customized for patients of a specific race: 10- to 15-year results. *J Arthroplasty*. 2016;31:190-193.

107. Vendittoli PA, Riviere C, Roy AG, Barry J, Lusignan D, Lavigne M. Metal-on-metal hip resurfacing compared with 28-mm diameter metal-on-metal total hip replacement: A randomised study with six to nine years' follow-up. *Bone Joint J* 2013;95-B:1464-1473.

108. Wang D., Li L.L., Wang H.Y., Pei F.X., Zhou ZK. Long-term results of cementless total hip arthroplasty with subtrochanteric shortening osteotomy in Crowe type IV developmental dysplasia. *J Arthroplasty*. 2017;32:1211-1219.

109. Wang T., Sun J.Y., Zhao X.J., Liu Y., Yin HB. Ceramic-on-ceramic bearings total hip arthroplasty in young patients. *Arthroplasty Today*. 2016;2:205-209.

110. Yamauchi Y, Jinno T, Koga D, Asou Y, Morita S, Okawa A. Comparison of different distal designs of femoral components and their effects on bone remodeling in 1-stage bilateral total hip arthroplasty. *J Arthroplasty*. 2012;27(8):1538-1543.

111. Yeung E, Bott PT, Chana R, et al. Mid-term results of third-generation alumina-on-alumina ceramic bearings in cementless total hip arthroplasty: A ten-year minimum follow-up. *J Bone Joint Surg Am*. 2012;94:138-144.

112. Yoo MC, Cho YJ, Kim KI, Ramteke A, Chun YS. The outcome of cementless total hip arthroplasty in haemophilic hip arthropathy. *Haemophilia*. 2009;15:766-773.

113. Zhang H, Cheng JQ, Shen B, Yang XN, Shi R, Pei FX. Cementless total hip arthroplasty in chinese patients with osteonecrosis of the femoral head. *J Arthroplasty*. 2008;23:102-111.

114. Zwartele RE, Olsthoorn PG, Poll RG, Brand R, Doets HC. Primary total hip arthroplasty with a flattened press-fit acetabular component in osteoarthritis and inflammatory arthritis: A prospective study on 416 hips with 6-10 years follow-up. *Arch Orthop Trauma Surg*. 2008;128:1379-1386.
